# Supplementary material for: Endovascular treatment for symptomatic intracranial artery stenosis: protocol for a systematic review and network meta-analysis
Source: PubMed Central journal article supplement — BMJ Open. 2018 Jul 10;8(7):e022359. doi: 10.1136/bmjopen-2018-022359 (PMC6089297; doi:10.1136/bmjopen-2018-022359), 2018-07-10
Supplement: bmjopen-2018-022359.draft_revisions.pdf [file bmjopen-2018-022359.draft_revisions.pdf]

# BMJ Open

BMJ Open is committed to open peer review. As part of this commitment we make the peer review history of every article we publish publicly available.

When an article is published we post the peer reviewers' comments and the authors' responses online. We also post the versions of the paper that were used during peer review. These are the versions that the peer review comments apply to.

The versions of the paper that follow are the versions that were submitted during the peer review process. They are not the versions of record or the final published versions. They should not be cited or distributed as the published version of this manuscript.

BMJ Open is an open access journal and the full, final, typeset and author-corrected version of record of the manuscript is available on our site with no access controls, subscription charges or pay-per-view fees (<http://bmjopen.bmj.com>).

If you have any questions on BMJ Open's open peer review process please email [editorial.bmjopen@bmj.com](mailto:editorial.bmjopen@bmj.com)

# BMJ Open

## Endovascular treatment for symptomatic intracranial artery stenosis: protocol for a systematic review and network meta-analysis

|                               |                                                                                                                                                                                                                                                                                                                                                                                                                                                                                                                                                                                                                                                                                                                                                                                                       |
|-------------------------------|-------------------------------------------------------------------------------------------------------------------------------------------------------------------------------------------------------------------------------------------------------------------------------------------------------------------------------------------------------------------------------------------------------------------------------------------------------------------------------------------------------------------------------------------------------------------------------------------------------------------------------------------------------------------------------------------------------------------------------------------------------------------------------------------------------|
| Journal:                      | <i>BMJ Open</i>                                                                                                                                                                                                                                                                                                                                                                                                                                                                                                                                                                                                                                                                                                                                                                                       |
| Manuscript ID                 | bmjopen-2018-022359                                                                                                                                                                                                                                                                                                                                                                                                                                                                                                                                                                                                                                                                                                                                                                                   |
| Article Type:                 | Protocol                                                                                                                                                                                                                                                                                                                                                                                                                                                                                                                                                                                                                                                                                                                                                                                              |
| Date Submitted by the Author: | 15-Feb-2018                                                                                                                                                                                                                                                                                                                                                                                                                                                                                                                                                                                                                                                                                                                                                                                           |
| Complete List of Authors:     | Wang, Tao; Xuanwu Hospital, Capital Medical University, Department of Neurosurgery<br>Wang, Xue; Xuanwu Hospital, Capital Medical University, Medical Library<br>Yang, Kun; Xuanwu Hospital, Capital Medical University, Department of Evidence-Based Medicine<br>Zhang, Jing; Xuanwu Hospital, Capital Medical University, Department of Neurology<br>Luo, Jichang; Xuanwu Hospital, Capital Medical University, Department of Neurosurgery<br>Gao, Peng; Xuanwu Hospital, Capital Medical University, Department of Neurosurgery<br>Ma, Yan; Xuanwu Hospital, Capital Medical University, Department of Neurosurgery<br>Jiao, Liqun; Xuanwu Hospital, Capital Medical University, Department of Neurosurgery<br>Ling, Feng; Xuanwu Hospital, Capital Medical University, Department of Neurosurgery |
| Keywords:                     | balloon angioplasty, balloon-mounted stent, self-expanding stent, intracranial artery stenosis, network meta-analysis, endovascular treatment                                                                                                                                                                                                                                                                                                                                                                                                                                                                                                                                                                                                                                                         |

SCHOLARONE™  
Manuscripts

# Endovascular treatment for symptomatic intracranial artery stenosis: protocol for a systematic review and network meta-analysis

Tao Wang<sup>1#</sup>, Xue Wang<sup>2#</sup>, Kun Yang<sup>3</sup>, Jing Zhang<sup>4</sup>, Jichang Luo<sup>1</sup>, Peng Gao<sup>1</sup>, Yan Ma<sup>1</sup>, Liquan Jiao<sup>1\*</sup>, Feng Ling<sup>1</sup>

\* **Correspondence to** Liquan Jiao; e-mail: [liquanjiao@sina.cn](mailto:liquanjiao@sina.cn); telephone: +86-010-83198277; fax numbers: +86-010-83199233; Department of Neurosurgery, Xuanwu Hospital, Capital Medical University, No. 45 Changchun Street, Beijing, China (100053)

# These authors contributed equally to this article.

<sup>1</sup> Department of Neurosurgery, Xuanwu Hospital, Capital Medical University, No. 45 Changchun Street, Beijing, China

<sup>2</sup> Medical Library, Xuanwu Hospital, Capital Medical University, No. 45 Changchun Street, Beijing, China

<sup>3</sup> Department of Evidence-Based Medicine, Xuanwu Hospital, Capital Medical University, No. 45 Changchun Street, Beijing, China

<sup>4</sup> Department of Neurology, Xuanwu Hospital, Capital Medical University, No. 45 Changchun Street, Beijing, China

**Keywords:** Endovascular treatment, balloon angioplasty, balloon-mounted stent, self-expanding stent, intracranial artery stenosis, network meta-analysis.

**Word count:** 3147 words.

## Abstract

**Introduction** Atherosclerotic intracranial artery stenosis (ICAS) is one of most common causes of stroke, which is the second-leading cause of death worldwide. Medical, surgical, and endovascular therapy are three major treatments for ICAS. Currently, medical therapy is considered as the standard of care for most patients with ICAS, while extracranial to intracranial bypass is only used rare situations. Balloon angioplasty alone (BA), balloon-mounted stent (BMS), and self-expanding stent (SES), collectively called endovascular treatment, have showed promising potentials in treating specific subgroups of patients with symptomatic ICAS, however, their comparative safety and efficacy is still unclear. Therefore, a systematic review with network meta-analysis is needed to establish a hierarchy of these endovascular treatments.

**Methods and analysis** The Preferred Reporting Items for Systematic Review and Meta-Analysis Protocols was followed to establish this protocol. Major databases including Cochrane Library, MEDLINE, EMBASE, Chinese Biomedical Literature Database, conference proceedings and grey literature database will be searched for clinical studies comparing at least two interventions for symptomatic ICAS patients. Primary outcomes include short- and long-term mortality or stroke rate. Random effects pairwise and network meta-analyses of included studies will be performed on STATA (Version 14, StataCorp. 2015). The surface under the cumulative ranking curve and mean rank will be calculated in order to establish a hierarchy of the endovascular treatments. Evaluation of the risk of bias, heterogeneity, consistency, transitivity and quality of evidence will follow the recommendations of the Cochrane Handbook for Systematic Reviews of Interventions.

**Ethics and dissemination:** Ethics approval is not needed for systematic review is based on published studies. Study findings will be presented at international conferences and published on a peer-reviewed journal.

**PROSPERO registration number:** CRD42018084055.

### Strengths and limitations of this study

To the best of our knowledge, this study will be the first systematic review and network meta-analysis of safety and efficacy of three subtypes of endovascular treatment for patients with symptomatic intracranial stenosis.

Besides randomized controlled studies, observational studies will also be included in order to obtain sufficient data for the network meta-analysis and improve the precision of estimates of adverse events.

The present study has a clearly established aim, state of the art methods for data collection, quality evaluation and quantitative synthesis.

The major challenge may come from unexpected heterogeneity from observational study designs. Stringent evaluation of transitivity will be conducted before data pooling for network meta-analysis.

## Background

### Description of the condition

Stroke is currently the second-leading cause of death just behind ischemic heart disease, causing 6.2 million death in 2015 worldwide [1, 2]. Atherosclerotic intracranial artery stenosis (ICAS), one of most common causes of stroke, accounted for 10-54% of all ischemic strokes. Stroke mortality presented with regional variation, with a disproportionately high mortality in Asian countries, which might be partially attributable to higher prevalence of intracranial atherosclerosis these regions [3]. Great economic and family burden have been caused by stroke globally, especially in low- and middle-income countries [4].

### Description of the intervention

Contemporary treatments for ICAS can be broadly categorized into medical, surgical, and endovascular therapy. Currently, medical treatment remains the standard of care for patients with ICAS [5]. Aggressive medical management (i.e., dual anti-platelet therapy along with intensive modifiable risk factor management) is supported by the latest studies [6-8] and recommended as the first-line therapy for symptomatic ICAS by the American Heart Association stroke prevention guidelines [9]. Extracranial to intracranial bypass surgery (EC-IC bypass) has been used to treatment for ICAS since 1980s, but it was proven to be associated with a worse prognosis versus medical treatment for ICAS patients in a RCT published in 1985 [10]. Ever since, EC-IC bypass is used in very few situations, such as stenoses progressing to occlusions with major hemodynamic impairment or in non atherosclerotic lesions like Moyamoya disease [11]. Endovascular therapy, also called percutaneous transluminal angioplasty and stenting (PTAS), was adopted from management of coronary heart disease and the first cases of its use in ICAS were reported in the 1980s [12]. It was considered as a minimally-invasive approach to treat symptomatic ICAS patients and was found to have an acceptable periprocedural complication rate and potential benefit in initial studies [8, 13-15]. Although results of SAMMPRIS and VISSIT trials didn't favor the use of PTAS in ICAS patients, many neurovascular practitioners and academics still believe that there is a role for endovascular treatment of ICAD [16]. Specific subgroups of patients, for example, African-American, Asian and Hispanic patients [17-20], high-risk subgroup of patients who do not respond well to intensive medical treatment [21, 22], and patients with hypoperfusion symptoms [22], which still needs to be confirmed by future studies.

### Rationale for the current systematic review

Endovascular therapy can be generally divided into three subtypes: balloon angioplasty alone (BA), balloon-mounted stent (BMS), or self-expanding stent (SES) [23]. So far, none of them has been established to be the primary option of endovascular therapy for specific subgroups of ICAS patients. Early studies comparing BA with stent placement showed comparable recurrent stroke or mortality rate, but stent treatment showed a lower rate of postoperative residual stenosis [24, 25]. Comparable immediate procedural outcomes were reported by another study [26]. A recent study, however, reported a significantly higher mortality (17.6% vs. 8.4%,  $P < 0.001$ ) but no difference of iatrogenic stroke rate (3.4% vs. 3.6%,  $P = 0.826$ ) in BA group, compared to stent group [27]. Therefore, the safety and efficacy of BA versus stent placement is still unclear. As for the efficacy of

1 BMS versus SES, the restenosis rate was showed to be higher in the SES than the BMS group [28-  
2 30]. However, whether the other major complication rates are different between them is still needed  
3 to be clarified. In summary, a systematic review with network meta-analysis that allows for both  
4 direct and indirect comparisons of multiple interventions is needed to decide the comparative ef-  
5 fects of the three subtypes of endovascular therapy. To our knowledge, this kind of systematic re-  
6 view has not been previously completed.

## 10 **Objective**

11 The primary objectives of this study are to (1) determine the effects of different endovascular treat-  
12 ments (i.e., balloon angioplasty alone, balloon-mounted stent or self-expanding stent) on patients  
13 with symptomatic intracranial artery stenosis, and (2) establish a hierarchy of endovascular treat-  
14 ments for treating symptomatic intracranial artery stenosis, through a systematic review with net-  
15 work meta-analysis of randomized trials and observational studies.

## 20 **Methods**

21 This protocol was developed according to the Preferred Reporting Items for Systematic Review and  
22 Meta-Analysis Protocols (PRISMA-P) (see **Supplement 1**. PRISMA-P Checklist) [31]. This sys-  
23 tematic review has been perspectively registered on the PROSPERO database (CRD42018084055,  
24 available at [http://www.crd.york.ac.uk/PROSPERO/display\\_record.php?ID=CRD42018084055](http://www.crd.york.ac.uk/PROSPERO/display_record.php?ID=CRD42018084055)).  
25 Any revision of this protocol and the whole review process will be updated timely on the  
26 PROSPERO registration. The conduction and reporting of this systematic review will follow the  
27 recommendations of the Cochrane Handbook for Systematic Reviews of Interventions and the  
28 PRISMA extension statement for reporting of systematic reviews incorporating network meta-  
29 analyses of health care interventions [32, 33].

### 34 **Criteria for considering studies for this review**

#### 35 *Types of studies*

36 Randomized controlled trials (RCTs) and quasi-RCTs (non-blinded, interrupted time series)  
37 will be included. Observational cohort, case-control and registry studies will be included to  
38 obtain adequate statistical power, because rare outcomes will be included in our review and  
39 identifying these rare adverse events are important to assess the intervention safety, and  
40 RCTs lack adequate statistical power to evaluate these uncommon/rare safety outcomes due  
41 to Type II (i.e., false negative) error [34]. Other types of studies including case series and  
42 case reports will be excluded. Studies published in Chinese journals will not be considered  
43 due to inappropriate randomization procedures have been reported in many of these studies  
44 [35].

#### 49 *Types of participants*

50 Patients with symptomatic intracranial arterial stenosis (ICAS) and degree of stenosis more  
51 than 50% (verified by angiography) will be included. The stenosis is located in at least one  
52 major intracranial artery (intracranial internal carotid artery, vertebral artery, or basilar ar-  
53 tery and their major branches). ICAS patients with a transient ischemic attack (TIA) or  
54

stroke are defined as symptomatic. A TIA was defined as a transient episode of neurological dysfunction (focal weakness or language disturbance, transient monocular blindness, or required assistance in walking) caused by focal brain or retinal ischemia that lasts for at least 10 minutes but resolves within 24 hours [36]. Intracranial arterial stenosis related to the following factors will be excluded: arterial dissection, moya-moya disease, vasculitic disease, radiation-induced vasculopathy, fibromuscular dysplasia, sickle cell disease, neurofibromatosis, suspected vasospastic process, and suspected recanalized embolus.

### *Types of interventions*

All competing interventions including any endovascular treatment as well as non-endovascular treatment strategy that can be administered for symptomatic ICAS are eligible for the analysis. Studies comparing at least two of the following eligible interventions will be considered in the analysis. We assume that any of the eligible interventions are, in principle, jointly randomizeable among any patients that meets the inclusion criteria. If we identify any interventions that we are not aware of, we will consider them as eligible and include them in the network after assessing their comparability with those named below.

#### 1. Interventions of direct interest

Studies that evaluated one or more of the following endovascular therapies, namely balloon angioplasty alone (BA), self-expanding stent (SES), and balloon-mounted stent (BMS) will be included. We will estimate the relative ranking of these interventions in the network meta-analysis according to primary outcomes.

#### 2. Inclusion of additional interventions to supplement the analysis

Studies that evaluated non-endovascular treatment, namely medical treatment alone, and extracranial-intracranial bypass, will also be included to increase the amount of available (indirect) information in the analysis.

### *Types of outcome measures*

Studies that reported at least one of the following outcomes will be included.

#### 1. Primary outcomes

(1) Short-term mortality or stroke rate (peri-procedural, or mean follow-up  $\leq 3$  month)

(2) Long-term mortality or stroke rate (mean follow-up  $\geq 6$  month)

#### 2. Secondary outcomes

(1) Long-term restenosis ( $\geq 50\%$  stenosis verified by angiography, mean follow-up  $\geq 6$  month)

(2) TIA rate (short- or long-term)

(3) Other major complications

### **Search methods for identification of studies**



Literature search will mainly be executed in three databases: MEDLINE, EMBASE, the Cochrane Central Register of Controlled Trials (CENTRAL). Search strategy has been drafted by an experienced librarian and revised by another librarian according to the Peer Review of Electronic Search Strategies checklist (see **Supplement 2**. Search strategy) [37]. In addition, we will also search other databases such as Chinese Biomedical Literature Database (CBM), Web of Science (WOS), and Open Grey (OG), and conference proceedings for relevant abstracts, the ISRCTN registry (<http://www.isrctn.com>), government registries (<http://www.clinicaltrials.gov>), and World Health Organization registries (<http://www.who.int/trialsearch/>) for on-going and recently completed studies. There will be no restrictions on study type, language or publication type. We will search the bibliography of all included studies and request original data from the primary authors when necessary.

## Data collection and analysis

### *Selection of studies*

Two reviewers will independently complete the two levels of study screening and selection. In level one screening, reviewers will determine if a study is eligible for inclusion by screening the title and abstract of articles retrieved from the literature search. In level two screening, the full-text of articles retained from level one screening will then be obtained and those that meet the eligible criteria will be included. When multiple studies report data from the same study population, or multiple articles of the same study series are published in chronological order, the study with the interventions of direct interest or the largest sample size will be retained. Before each level of screening, a pilot-test, based on the pre-designed test forms (see **Supplement 3**. Screening pilot-test form; adapted from Tricco, et al. [38]), will be conducted to calculate inter-rater reliability and high agreement ( $\geq 80\%$ ) is required to launch the formal screening. Discrepancies between the two reviewers will be resolved by discussion or otherwise a third reviewer. In cases of any ambiguity or insufficient data, study authors will be contacted for further information.

### *Data extraction and management*

Similar with the screening process, data extraction will also be conducted by two reviewers, independently. A data abstraction form will be created in Excel and include two types of data:

1. Outcome data

Number of primary and secondary outcome events, total number of patients, the interventions being compared, and follow-up duration will be extracted from included studies. Arm level data will be extracted.

2. Data on potential effect modifiers

Data that may act as effect modifiers will be extracted from included studies, including: (1). study characteristics (e.g., study design, volume of study center, date of publication, journal of publication, study location(s), study funding); (2). population characteristics (e.g., mean or median age, proportion of male patients, degree of pre-procedural stenosis, functional status at presentation, past medical history, drinking

1 and smoking status, stenosis site of the intracranial artery); (3). intervention charac-  
2 teristics (e.g., placement success rate, residual stenosis).  
3  
4

5 And a similar pilot-test to calculate inter-rater reliability is required to confirm high agree-  
6 ment ( $\geq 80\%$ ) between two reviewers. Similarly, two reviewers will be resolve disagree-  
7 ments by discussion or otherwise a third reviewer. And we will contact study authors for  
8 further information in case of any ambiguity or insufficient data.  
9

#### 10 *Assessment of risk of bias in included studies*

11 Similarly, two reviewers will independently assess risk of bias, and conflicts will be re-  
12 solved through discussion or otherwise a third reviewer. The risk of bias of RCTs and quasi-  
13 RCTs will be assessed with items in the Cochrane Collaboration's tool [32], while that of  
14 non-RCTs (observational cohort and case-control studies) will be assessed with the Newcas-  
15 tle-Ottawa Scale (see **Supplement 4**. Newcastle-Ottawa Scale) [39].  
16  
17  
18

#### 19 *Measures of treatment effect*

20 As primary and secondary outcomes are all dichotomous data, odds ratios (ORs) will be  
21 used as the measure of treatment effect. Relative treatment effects will be presented as the  
22 summary relative effect sizes (ORs) and associated 95% credible intervals (CIs) for each  
23 possible pairwise comparison. Relative treatment ranking will also be estimated using the  
24 surface under the cumulative ranking curve (SUCRA) and mean ranks [40].  
25  
26  
27

#### 28 *Dealing with missing data*

29 Some of the outcomes are assumed to be rare. Thus, zero events in one arm might be re-  
30 ported. In this case, 0.5 will be added to the numerator and 1 will be added to the denomina-  
31 tor. Studies reporting zero events in all arms for primary outcomes will be excluded [41,  
32 42]. When encountering missing data in the included studies, we will contact the study au-  
33 thors for these data first. If the data are still unavailable upon requests, we will impute miss-  
34 ing data using established methods, including informative missing odds ratios (IMORs) for  
35 dichotomous outcomes and informative missingness difference of means (IMDoM) for con-  
36 tinuous outcomes [43] [44]. Further more, a sensitivity analysis will be conduct to ensure  
37 that our imputations do not bias the final results [45].  
38  
39  
40  
41

#### 42 *Assessment of clinical and methodological heterogeneity and transitivity*

43 Across all eligible trials that compare each pair of interventions, descriptive statistics for  
44 potential effect modifiers described above (i.e., study, population and intervention character-  
45 istics) will be generated. We will assess the presence of clinical and methodological  
46 heterogeneity both within and across treatment comparisons by calculating the  $I^2$  within  
47 each pairwise comparison [46]. We will assess the assumption of transitivity across treat-  
48 ment comparisons by comparing the distribution of the potential effect modifiers across the  
49 different pairwise comparisons using boxplots or percentages [47, 48]. The above factors are  
50 ensured prior to conducting the following pairwise and network meta-analyses.  
51  
52  
53  
54

### 55 **Data synthesis**

As described above, if quantitative synthesis is not appropriate or the data are insufficient, the findings of our systematic review will be narratively reported. When quantitative analysis is plausible, the following pairwise and network meta-analyses will be conducted in STATA (Vision 14, StataCorp. 2015). We will first restrict our analysis to RCTs, then include data from quasi-RCTs, and finally, data from observational studies. This sequential approach of analyses will provide an understanding of the contribution of each type of study design to our summary estimates.

#### *Methods for direct treatment comparisons*

Initially, we will perform standard pairwise meta-analyses for every direct treatment comparison with at least two studies (see **Figure 1**). We will use Bayesian random-effects models to derive summary effect measures with associated 95% credible intervals [49]. The normal distribution will be used in the vague priors for all trial baselines, treatment effects, and between-study standard deviations.

#### *Methods for indirect and mixed comparisons*

We will perform network meta-analysis using the three-level hierarchical, random-effects model as described in Schmitz et al., due to both RCTs and non-RCTs are included [50]. The normal distribution will also be used as the vague priors. We will rank relative treatment effects using mean ranks and the SUCRA [40]. Rank-heat plots will be used to display the treatment rankings across multiple outcomes [51].

#### *Assessment of statistical inconsistency*

We will evaluate the inconsistency between direct and indirect data locally by using the loop-specific method [52, 53] and the node-splitting method [54], and globally by using the design-by-treatment interaction model [55].

#### *Investigation of heterogeneity and inconsistency and sensitivity analyses*

Subgroup analyses will be conducted to explore if sufficient data are available. The following effect modifiers will be included in subgroup analyses: age, sex, degree of pre-procedural stenosis, functional status at presentation, stenosis site of the intracranial artery. Network meta-regression will be used to explore the effect of study year and study country if more than 10 studies are available. Sensitivity analyses will be conducted to test the robustness of our study findings by incorporating only data from the following studies when adequate studies are available: RCTs, quasi-RCTs and cohort studies reporting effect measures that are adjusted for important confounders.

## **Discussion**

The main anticipated challenge for the present systematic review and network meta-analysis is incorporating both randomized and observational studies. The rationale for including non-randomized studies is to obtain adequate statistical power to evaluate the outcomes, especially for the rare complications, because only a small amount of randomized studies were identified through an experimental search for eligible studies. Given that observational studies have inherited methodological limitations compared to randomized studies, another challenge is ensuring the treatment compari-

1  
2 sons in our study maintain transitivity in our network meta-analyses while also remaining clinically  
3 meaningful to knowledge users.  
4

5 It is expected that the study findings will address important questions about the relative safety and  
6 efficacy of different endovascular treatments for patients with symptomatic ICAS, allow patients  
7 and care-providers to make informed decisions, and provide comprehensive information for future  
8 study designs.  
9

10  
11  
12 **Contributors** LJ, FL and YM developed the initial idea for this study. XW, TW and KY developed and revised  
13 the search strategy. TW, JZ and PG finished the study design. LJ, FL and YM were consulted about clinical is-  
14 sues. TW, JL and KY contributed to the original draft. PG, JZ and XW were responsible for the revision of the  
15 draft. TW and XW contributed equally to this article. All of the authors approved the final work prior to submis-  
16 sion.  
17  
18

19 **Funding** This work was supported by the Ministry of Science and Technology of the People's Republic of China  
20 (2016YFC1301700). The funder has no role in study design, data analysis and writing the manuscript.  
21

22 **Competing interests** None declared.  
23

24 **Ethics approval** No ethic approval is needed for published data.  
25  
26  
27  
28  
29  
30  
31  
32  
33  
34  
35  
36  
37  
38  
39  
40  
41  
42  
43  
44  
45  
46  
47  
48  
49  
50  
51  
52  
53  
54  
55  
56  
57  
58  
59  
60

1  
2  
3  
4  
5 **Figure 1.** Network of all possible pairwise comparisons between the eligible interventions. BA: bal-  
6 loon angioplasty; BMS: balloon mounted stent; SES: self-expanding stent; EC-IC bypass: extracra-  
7 nial-intracranial bypass.  
8  
9  
10  
11  
12  
13  
14  
15  
16  
17  
18  
19  
20  
21  
22  
23  
24  
25  
26  
27  
28  
29  
30  
31  
32  
33  
34  
35  
36  
37  
38  
39  
40  
41  
42  
43  
44  
45  
46  
47  
48  
49  
50  
51  
52  
53  
54  
55  
56  
57  
58  
59  
60

For peer review only

## Reference

1. Banerjee, C. and M.I. Chimowitz, Stroke Caused by Atherosclerosis of the Major Intracranial Arteries. *Circ Res*, 2017. **120**(3): p. 502-513.
2. WHO, Global Health Observatory (GHO) data. 2017: WHO.
3. Johnston, S.C., S. Mendis, and C.D. Mathers, Global variation in stroke burden and mortality: estimates from monitoring, surveillance, and modelling. *Lancet Neurol*, 2009. **8**(4): p. 345-54.
4. Gretarsdottir, S., et al., Risk variants for atrial fibrillation on chromosome 4q25 associate with ischemic stroke. *Ann Neurol*, 2008. **64**(4): p. 402-9.
5. van den Wijngaard, I.R., et al., Treatment and imaging of intracranial atherosclerotic stenosis: current perspectives and future directions. *Brain Behav*, 2016. **6**(11): p. e00536.
6. Derdeyn, C.P., et al., Aggressive medical treatment with or without stenting in high-risk patients with intracranial artery stenosis (SAMMPRIS): the final results of a randomised trial. *Lancet*, 2014. **383**(9914): p. 333-41.
7. Leung, T.W., et al., Evolution of intracranial atherosclerotic disease under modern medical therapy. *Ann Neurol*, 2015. **77**(3): p. 478-86.
8. Zaidat, O.O., et al., Effect of a balloon-expandable intracranial stent vs medical therapy on risk of stroke in patients with symptomatic intracranial stenosis: the VISSIT randomized clinical trial. *JAMA*, 2015. **313**(12): p. 1240-8.
9. Kernan, W.N., et al., Guidelines for the prevention of stroke in patients with stroke and transient ischemic attack: a guideline for healthcare professionals from the American Heart Association/American Stroke Association. *Stroke*, 2014. **45**(7): p. 2160-236.
10. Group, E.I.B.S., Failure of extracranial-intracranial arterial bypass to reduce the risk of ischemic stroke. Results of an international randomized trial. *N Engl J Med*, 1985. **313**(19): p. 1191-200.
11. Reith, W., et al., Diagnosis and Treatment of Intracranial Stenoses. *Clin Neuroradiol*, 2015. **25 Suppl 2**: p. 307-16.
12. Sundt, T.M., Jr., et al., Transluminal angioplasty for basilar artery stenosis. *Mayo Clin Proc*, 1980. **55**(11): p. 673-80.
13. Wong, K.S., et al., Clopidogrel plus aspirin versus aspirin alone for reducing embolisation in patients with acute symptomatic cerebral or carotid artery stenosis (CLAIR study): a randomised, open-label, blinded-endpoint trial. *Lancet Neurol*, 2010. **9**(5): p. 489-97.
14. Derdeyn, C.P., et al., Aggressive medical treatment with or without stenting in high-risk patients with intracranial artery stenosis (SAMMPRIS): the final results of a randomised trial. *The Lancet*, 2014. **383**(9914): p. 333-341.
15. Turan, T.N., et al., Intracranial stenosis: impact of randomized trials on treatment preferences of US neurologists and neurointerventionists. *Cerebrovasc Dis*, 2014. **37**(3): p. 203-11.
16. Zaidat, O., et al., Impact of SAMMPRIS on the future of intracranial atherosclerotic disease management: polling results from the ICAD symposium at the International Stroke Conference. 2014. **6**(3): p. 225-230.
17. Sacco, R.L., et al., Race-ethnicity and determinants of intracranial atherosclerotic cerebral infarction. The Northern Manhattan Stroke Study. *Stroke*, 1995. **26**(1): p. 14-20.
18. Liu, H.M., et al., Evaluation of intracranial and extracranial carotid steno-occlusive diseases in Taiwan Chinese patients with MR angiography: preliminary experience. *Stroke*, 1996. **27**(4): p. 650-3.
19. White, H., et al., Ischemic stroke subtype incidence among whites, blacks, and Hispanics: the Northern Manhattan Study. *Circulation*, 2005. **111**(10): p. 1327-31.
20. Wang, Y., et al., Prevalence and outcomes of symptomatic intracranial large artery stenoses and occlusions in China: the Chinese Intracranial Atherosclerosis (CICAS) Study. *Stroke*, 2014. **45**(3): p. 663-9.

21. Abou-Chebl, A. and H. Steinmetz, Critique of "Stenting versus aggressive medical therapy for intracranial arterial stenosis" by Chimowitz et al in the new England Journal of Medicine. *Stroke*, 2012. **43**(2): p. 616-20.
22. Gao, P., et al., China Angioplasty and Stenting for Symptomatic Intracranial Severe Stenosis (CASSISS): A new, prospective, multicenter, randomized controlled trial in China. *Interv Neuro-radiol*, 2015. **21**(2): p. 196-204.
23. Tebeb, M.S., et al., Endovascular management of intracranial atherosclerosis. *Neurosurg Clin N Am*, 2014. **25**(3): p. 593-605.
24. Qureshi, A.I., et al., Concurrent comparison of outcomes of primary angioplasty and of stent placement in high-risk patients with symptomatic intracranial stenosis. *Neurosurgery*, 2008. **62**(5): p. 1053-60; discussion 1060-2.
25. Siddiq, F., et al., Comparison of primary angioplasty with stent placement for treating symptomatic intracranial atherosclerotic diseases: a multicenter study. *Stroke*, 2008. **39**(9): p. 2505-10.
26. Qureshi, A.I., et al., A randomized trial comparing primary angioplasty versus stent placement for symptomatic intracranial stenosis. *J Vasc Interv Neurol*, 2013. **6**(2): p. 34-41.
27. Villwock, M.R., et al., Primary Angioplasty Versus Stenting for Endovascular Management of Intracranial Atherosclerotic Disease Following Acute Ischemic Stroke. *J Vasc Interv Neurol*, 2016. **9**(1): p. 1-6.
28. Yue, X., et al., Comparison of BMSs with SES for symptomatic intracranial disease of the middle cerebral artery stenosis. *Cardiovasc Intervent Radiol*, 2011. **34**(1): p. 54-60.
29. Park, S., et al., Intracranial stenting for severe symptomatic stenosis: self-expandable versus balloon-expandable stents. *Interv Neuroradiol*, 2013. **19**(3): p. 276-82.
30. Miao, Z., et al., Outcomes of tailored angioplasty and/or stenting for symptomatic intracranial atherosclerosis: a prospective cohort study after SAMMPRIS. *J Neurointerv Surg*, 2015. **7**(5): p. 331-5.
31. Shamseer, L., et al., Preferred reporting items for systematic review and meta-analysis protocols (PRISMA-P) 2015: elaboration and explanation. *Bmj*, 2015. **350**: p. g7647.
32. Higgins JPT, G.S., *Cochrane Handbook for Systematic Reviews of Interventions Version 5.1.0 [updated March 2011]*. The Cochrane Collaboration, 2011: p. Available from: <http://handbook.cochrane.org/>.
33. Hutton, B., et al., The PRISMA extension statement for reporting of systematic reviews incorporating network meta-analyses of health care interventions: checklist and explanations. *Ann Intern Med*, 2015. **162**(11): p. 777-84.
34. Eypasch, E., et al., Probability of adverse events that have not yet occurred: a statistical reminder. *Bmj*, 1995. **311**(7005): p. 619-20.
35. Wu TX, L.Y., Liu GJ, et al., Investigation of authenticity of 'claimed' randomized controlled trials (RCTs) and quality assessment of RCT reports published in China. 2006: Dublin, Ireland.
36. Easton, J.D., et al., Definition and evaluation of transient ischemic attack: a scientific statement for healthcare professionals from the American Heart Association/American Stroke Association Stroke Council; Council on Cardiovascular Surgery and Anesthesia; Council on Cardiovascular Radiology and Intervention; Council on Cardiovascular Nursing; and the Interdisciplinary Council on Peripheral Vascular Disease. The American Academy of Neurology affirms the value of this statement as an educational tool for neurologists. *Stroke*, 2009. **40**(6): p. 2276-93.
37. Sampson Jacinda, B., O. Vardeny, and M. Flanigan Kevin Aminoglycosides and other non-sense suppression therapies for the treatment of dystrophinopathy. *Cochrane Database of Systematic Reviews*, 2009. DOI: 10.1002/14651858.CD007985.
38. Tricco, A.C., et al., Comparative safety of anti-epileptic drugs among infants and children exposed in utero or during breastfeeding: protocol for a systematic review and network meta-analysis. *Syst Rev*, 2014. **3**: p. 68.

- 1 39. Wells GA, S.B., O'Connell D, Peterson J, Welch V, Losos M, et al., The Newcastle-Ottawa  
2 Scale (NOS) for assessing the quality of nonrandomised studies in meta-analyses. 2010: p. Availa-  
3 ble from: [http://www.ohri.ca/programs/  
4 clinical\\_epidemiology/oxford.asp](http://www.ohri.ca/programs/clinical_epidemiology/oxford.asp).
- 5 40. Salanti, G., A.E. Ades, and J.P. Ioannidis, Graphical methods and numerical summaries for  
6 presenting results from multiple-treatment meta-analysis: an overview and tutorial. *J Clin  
7 Epidemiol*, 2011. **64**(2): p. 163-71.
- 8 41. Sweeting, M.J., A.J. Sutton, and P.C. Lambert, What to add to nothing? Use and avoidance  
9 of continuity corrections in meta-analysis of sparse data. *Stat Med*, 2004. **23**(9): p. 1351-75.
- 10 42. Bradburn, M.J., et al., Much ado about nothing: a comparison of the performance of meta-  
11 analytical methods with rare events. *Stat Med*, 2007. **26**(1): p. 53-77.
- 12 43. Spineli, L.M., et al., Evaluating the impact of imputations for missing participant outcome  
13 data in a network meta-analysis. *Clin Trials*, 2013. **10**(3): p. 378-88.
- 14 44. Mavridis, D., et al., Allowing for uncertainty due to missing continuous outcome data in  
15 pairwise and network meta-analysis. *Stat Med*, 2015. **34**(5): p. 721-41.
- 16 45. Carpenter, J., G. Rucker, and G. Schwarzer, Assessing the sensitivity of meta-analysis to  
17 selection bias: a multiple imputation approach. *Biometrics*, 2011. **67**(3): p. 1066-72.
- 18 46. Jackson, D., et al., A design-by-treatment interaction model for network meta-analysis with  
19 random inconsistency effects. *Stat Med*, 2014. **33**(21): p. 3639-54.
- 20 47. Salanti, G., Indirect and mixed-treatment comparison, network, or multiple-treatments meta-  
21 analysis: many names, many benefits, many concerns for the next generation evidence synthesis  
22 tool. *Res Synth Methods*, 2012. **3**(2): p. 80-97.
- 23 48. Jansen, J.P. and H. Naci, Is network meta-analysis as valid as standard pairwise meta-  
24 analysis? It all depends on the distribution of effect modifiers. *BMC Med*, 2013. **11**: p. 159.
- 25 49. Sutton, A.J. and K.R. Abrams, Bayesian methods in meta-analysis and evidence synthesis.  
26 *Stat Methods Med Res*, 2001. **10**(4): p. 277-303.
- 27 50. Schmitz, S., R. Adams, and C. Walsh, Incorporating data from various trial designs into a  
28 mixed treatment comparison model. *Stat Med*, 2013. **32**(17): p. 2935-49.
- 29 51. Veroniki, A.A., et al., The rank-heat plot is a novel way to present the results from a net-  
30 work meta-analysis including multiple outcomes. *J Clin Epidemiol*, 2016. **76**: p. 193-9.
- 31 52. Song, F., et al., Validity of indirect comparison for estimating efficacy of competing inter-  
32 ventions: empirical evidence from published meta-analyses. *Bmj*, 2003. **326**(7387): p. 472.
- 33 53. Veroniki, A.A., et al., Evaluation of inconsistency in networks of interventions. *Int J  
34 Epidemiol*, 2013. **42**(1): p. 332-45.
- 35 54. Dias, S., et al., Checking consistency in mixed treatment comparison meta-analysis. *Stat  
36 Med*, 2010. **29**(7-8): p. 932-44.
- 37 55. White, I.R., et al., Consistency and inconsistency in network meta-analysis: model estima-  
38 tion using multivariate meta-regression. *Res Synth Methods*, 2012. **3**(2): p. 111-25.
- 39  
40  
41  
42  
43  
44  
45  
46  
47  
48  
49  
50  
51  
52  
53  
54  
55  
56  
57  
58  
59  
60



1  
2  
3  
4  
5  
6  
7  
8  
9  
10  
11  
12  
13  
14  
15  
16  
17  
18  
19  
20  
21  
22  
23  
24  
25  
26  
27  
28  
29  
30  
31  
32  
33  
34  
35  
36  
37  
38  
39  
40  
41  
42  
43  
44  
45  
46  
47  
48  
49  
50  
51  
52  
53  
54  
55  
56  
57  
58  
59  
60

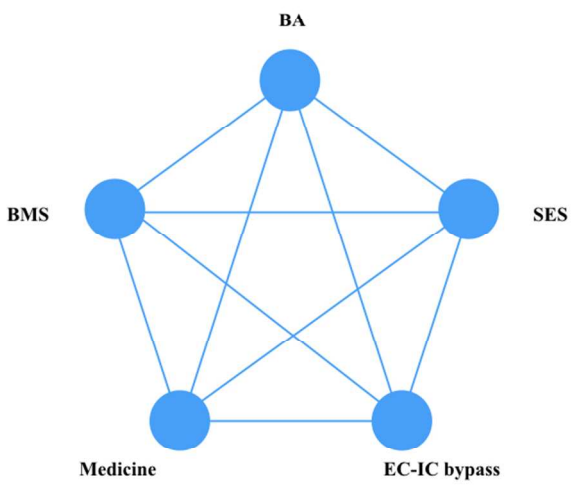

Figure 1. Network of all possible pairwise comparisons between the eligible interventions.

361x270mm (72 x 72 DPI)

Peer review only

**Supplement 1.** PRISMA-P (Preferred Reporting Items for Systematic review and Meta-Analysis Protocols) 2015 checklist: recommended items to address in a systematic review protocol\*

| Section and topic                 | Item No | Checklist item                                                                                                                                                                                  | Check results |
|-----------------------------------|---------|-------------------------------------------------------------------------------------------------------------------------------------------------------------------------------------------------|---------------|
| <b>ADMINISTRATIVE INFORMATION</b> |         |                                                                                                                                                                                                 |               |
| Title:                            |         |                                                                                                                                                                                                 |               |
| Identification                    | 1a      | Identify the report as a protocol of a systematic review                                                                                                                                        | Yes           |
| Update                            | 1b      | If the protocol is for an update of a previous systematic review, identify as such                                                                                                              | Yes           |
| Registration                      | 2       | If registered, provide the name of the registry (such as PROSPERO) and registration number                                                                                                      | Yes           |
| Authors:                          |         |                                                                                                                                                                                                 |               |
| Contact                           | 3a      | Provide name, institutional affiliation, e-mail address of all protocol authors; provide physical mailing address of corresponding author                                                       | Yes           |
| Contributions                     | 3b      | Describe contributions of protocol authors and identify the guarantor of the review                                                                                                             | Yes           |
| Amendments                        | 4       | If the protocol represents an amendment of a previously completed or published protocol, identify as such and list changes; otherwise, state plan for documenting important protocol amendments | Yes           |
| Support:                          |         |                                                                                                                                                                                                 |               |
| Sources                           | 5a      | Indicate sources of financial or other support for the review                                                                                                                                   | Yes           |
| Sponsor                           | 5b      | Provide name for the review funder and/or sponsor                                                                                                                                               | Yes           |
| Role of sponsor or funder         | 5c      | Describe roles of funder(s), sponsor(s), and/or institution(s), if any, in developing the protocol                                                                                              | Yes           |

**INTRODUCTION**

|            |   |                                                                                                                                                          |     |
|------------|---|----------------------------------------------------------------------------------------------------------------------------------------------------------|-----|
| Rationale  | 6 | Describe the rationale for the review in the context of what is already known                                                                            | Yes |
| Objectives | 7 | Provide an explicit statement of the question(s) the review will address with reference to participants, interventions, comparators, and outcomes (PICO) | Yes |

**METHODS**

|                      |    |                                                                                                                                                                                                                               |     |
|----------------------|----|-------------------------------------------------------------------------------------------------------------------------------------------------------------------------------------------------------------------------------|-----|
| Eligibility criteria | 8  | Specify the study characteristics (such as PICO, study design, setting, time frame) and report characteristics (such as years considered, language, publication status) to be used as criteria for eligibility for the review | Yes |
| Information sources  | 9  | Describe all intended information sources (such as electronic databases, contact with study authors, trial registers or other grey literature sources) with planned dates of coverage                                         | Yes |
| Search strategy      | 10 | Present draft of search strategy to be used for at least one electronic database, including planned limits, such that it could be repeated                                                                                    | Yes |

Study records:

|                             |     |                                                                                                                                                                                                 |     |
|-----------------------------|-----|-------------------------------------------------------------------------------------------------------------------------------------------------------------------------------------------------|-----|
| Data management             | 11a | Describe the mechanism(s) that will be used to manage records and data throughout the review                                                                                                    | Yes |
| Selection process           | 11b | State the process that will be used for selecting studies (such as two independent reviewers) through each phase of the review (that is, screening, eligibility and inclusion in meta-analysis) | Yes |
| Data collection process     | 11c | Describe planned method of extracting data from reports (such as piloting forms, done independently, in duplicate), any processes for obtaining and confirming data from investigators          | Yes |
| Data items                  | 12  | List and define all variables for which data will be sought (such as PICO items, funding sources), any pre-planned data assumptions and simplifications                                         | Yes |
| Outcomes and prioritization | 13  | List and define all outcomes for which data will be sought, including prioritization of main and additional outcomes, with rationale                                                            | Yes |

|                                    |     |                                                                                                                                                                                                                                                  |     |
|------------------------------------|-----|--------------------------------------------------------------------------------------------------------------------------------------------------------------------------------------------------------------------------------------------------|-----|
| Risk of bias in individual studies | 14  | Describe anticipated methods for assessing risk of bias of individual studies, including whether this will be done at the outcome or study level, or both; state how this information will be used in data synthesis                             | Yes |
| Data synthesis                     | 15a | Describe criteria under which study data will be quantitatively synthesised                                                                                                                                                                      | Yes |
|                                    | 15b | If data are appropriate for quantitative synthesis, describe planned summary measures, methods of handling data and methods of combining data from studies, including any planned exploration of consistency (such as $I^2$ , Kendall's $\tau$ ) | Yes |
|                                    | 15c | Describe any proposed additional analyses (such as sensitivity or subgroup analyses, meta-regression)                                                                                                                                            | Yes |
|                                    | 15d | If quantitative synthesis is not appropriate, describe the type of summary planned                                                                                                                                                               | Yes |
| Meta-bias(es)                      | 16  | Specify any planned assessment of meta-bias(es) (such as publication bias across studies, selective reporting within studies)                                                                                                                    | Yes |
| Confidence in cumulative evidence  | 17  | Describe how the strength of the body of evidence will be assessed (such as GRADE)                                                                                                                                                               | Yes |

**\* It is strongly recommended that this checklist be read in conjunction with the PRISMA-P Explanation and Elaboration (cite when available) for important clarification on the items. Amendments to a review protocol should be tracked and dated. The copyright for PRISMA-P (including checklist) is held by the PRISMA-P Group and is distributed under a Creative Commons Attribution Licence 4.0.**

*From: Shamseer L, Moher D, Clarke M, Ghersi D, Liberati A, Petticrew M, Shekelle P, Stewart L, PRISMA-P Group. Preferred reporting items for systematic review and meta-analysis protocols (PRISMA-P) 2015: elaboration and explanation. BMJ. 2015 Jan 2;349(jan02 1):g7647.*

## Supplement 2. Search strategy.

| Search step | Search terms                                                                                                                                                                                                                                                                                                                                                                                                                                                                                                                                                                                                                                                                                                                                                                                                                                                                                                                                                                                                                    |
|-------------|---------------------------------------------------------------------------------------------------------------------------------------------------------------------------------------------------------------------------------------------------------------------------------------------------------------------------------------------------------------------------------------------------------------------------------------------------------------------------------------------------------------------------------------------------------------------------------------------------------------------------------------------------------------------------------------------------------------------------------------------------------------------------------------------------------------------------------------------------------------------------------------------------------------------------------------------------------------------------------------------------------------------------------|
| #1          | ((((((((((((((((("Intracranial Arterial Diseases"[Mesh]) AND "Constriction, Pathologic"[Mesh]) OR "Intracranial Arteriosclerosis"[Mesh]) OR intracranial arterial stenosis) OR intracranial atherosclerosis) OR intracranial stenosis) OR intracranial atherosclerotic stenosis) OR intracranial atherosclerotic diseases) OR "Vertebrobasilar Insufficiency"[Mesh]) OR intracranial vertebral artery stenosis) OR intracranial vertebrobasilar artery stenosis) OR ischemic cerebrovascular disease caused by artery stenosis) OR basilar artery stenosis) OR cerebral artery stenosis) OR vertebral artery stenosis) OR atherosclerotic vertebrobasilar artery occlusion) OR (intracranial large artery stenoses and occlusions)) OR (intracranial large artery stenosis and occlusions)) OR intracranial vertebral artery atherosclerotic stenosis) OR vertebral atherosclerotic diseases) OR vertebral atherosclerosis diseases) OR intracranial internal carotid artery stenosis) OR atherosclerotic intracranial stenosis |
| #2          | (((balloon expandable intracranial stent*) OR balloon expandable stent*) OR balloon dilatable stent*) OR balloon mounted stent*) OR balloon angioplasty with stent*                                                                                                                                                                                                                                                                                                                                                                                                                                                                                                                                                                                                                                                                                                                                                                                                                                                             |
| #3          | (((self expanding stent*) OR self expanded stent*) OR self expandable stent*) OR primary stent*                                                                                                                                                                                                                                                                                                                                                                                                                                                                                                                                                                                                                                                                                                                                                                                                                                                                                                                                 |
| #4          | (((((((balloon angioplasty) OR balloon dilatation) OR balloon dilation) OR primary angioplasty) OR intracranial angioplasty alone) OR endovascular treatment alone) OR endovascular therapy alone) OR intravascular treatment alone) OR intravascular therapy alone                                                                                                                                                                                                                                                                                                                                                                                                                                                                                                                                                                                                                                                                                                                                                             |

|     |                                                                                                                                                                                                                                                                                                                                                                                                                                                                                                                                                                                                                                                                                                                                                                                                                                                                                                                                                                                                                                                                                                                                                                                                                                                                                                                                                                                                                                                                                                                                                                                                                                                                                                               |
|-----|---------------------------------------------------------------------------------------------------------------------------------------------------------------------------------------------------------------------------------------------------------------------------------------------------------------------------------------------------------------------------------------------------------------------------------------------------------------------------------------------------------------------------------------------------------------------------------------------------------------------------------------------------------------------------------------------------------------------------------------------------------------------------------------------------------------------------------------------------------------------------------------------------------------------------------------------------------------------------------------------------------------------------------------------------------------------------------------------------------------------------------------------------------------------------------------------------------------------------------------------------------------------------------------------------------------------------------------------------------------------------------------------------------------------------------------------------------------------------------------------------------------------------------------------------------------------------------------------------------------------------------------------------------------------------------------------------------------|
| #5  | ((((((((((((("Drug Therapy"[Mesh]) OR drug therapy) OR pharmacotherapy) OR chemotherapy) OR medication)) OR (((((((((((((((("Aspirin"[Mesh]) OR aspirin) OR acetylsalicylic acid) OR ASA) OR "2-acetyloxy benzoic acid") OR acylpyrin) OR aloxiprinum) OR colfarit) OR disopril) OR ecotrin) OR endosprin) OR magnecyl) OR micristin) OR polopirin) OR polopiryna) OR solprins) OR solupsan) OR zorprin) OR acetysal)) OR (((((((((((("clopidogrel" [Supplementary Concept]) OR clopidogrel) OR iscover) OR pcr 4099) OR pcr-4099) OR pcr4099) OR plavix) OR sr 25989) OR sr-25989) OR sr25989) OR sr 25990c) OR sr-25990c) OR sr25990c)) OR (((((((((((("Warfarin"[Mesh]) OR warfarin) OR aldocumar) OR warfant) OR coumadin) OR coumarin) OR marevan) OR coumadine) OR tedicumar) OR jantoven) OR waran)) OR (((((((("cilostazol" [Supplementary Concept]) OR cilostazol) OR pletal) OR pletaal) OR OPC 13013) OR OPC-13013) OR OPC13013) OR OPC 21) OR OPC-21) OR OPC21)) OR (((((((("Ticagrelor" [Supplementary Concept]) OR ticagrelor) OR brilinta) OR brilique) OR AZD 6140) OR AZD-6140) OR AZD6140)) OR (((((((("Ticlopidine"[Mesh]) OR ticlopidine) OR ticlid) OR tiklid) OR ticlodix) OR ticlodone) OR panaldine) OR 53 32C) OR 53-32C) OR 5332C)) OR (((((((("Prasugrel Hydrochloride"[Mesh]) OR prasugrel) OR efient) OR effient) OR CS 747) OR CS-747) OR CS747) OR LY 640315) OR LY-640315) OR LY640315)) OR (((("Thienopyridines"[Mesh]) OR thienopyridine) OR thienopyridines)) OR (((((((("Aspirin, Dipyridamole Drug Combination"[Mesh]) OR aspirin-dipyridamole drug combination) OR aspirin dipyridamole drug combination) OR TX 3301) OR TX-3301) OR TX3301) OR asasantin) OR aggrenox) |
| #6  | ((((((((("Cerebral Revascularization"[Mesh]) OR extracranial-intracranial) OR extracranial intracranial) OR extra-intracranial) OR extra intracranial) OR EC-IC) OR ECIC) OR graft) OR bypass) OR bypasses                                                                                                                                                                                                                                                                                                                                                                                                                                                                                                                                                                                                                                                                                                                                                                                                                                                                                                                                                                                                                                                                                                                                                                                                                                                                                                                                                                                                                                                                                                    |
| #7  | #1 AND #2 AND #3 AND #4                                                                                                                                                                                                                                                                                                                                                                                                                                                                                                                                                                                                                                                                                                                                                                                                                                                                                                                                                                                                                                                                                                                                                                                                                                                                                                                                                                                                                                                                                                                                                                                                                                                                                       |
| #8  | #1 AND (#2 OR #3 OR #4)                                                                                                                                                                                                                                                                                                                                                                                                                                                                                                                                                                                                                                                                                                                                                                                                                                                                                                                                                                                                                                                                                                                                                                                                                                                                                                                                                                                                                                                                                                                                                                                                                                                                                       |
| #9  | #1 AND #5 AND #6                                                                                                                                                                                                                                                                                                                                                                                                                                                                                                                                                                                                                                                                                                                                                                                                                                                                                                                                                                                                                                                                                                                                                                                                                                                                                                                                                                                                                                                                                                                                                                                                                                                                                              |
| #10 | Filters: Publication date from 2000/01/01; English                                                                                                                                                                                                                                                                                                                                                                                                                                                                                                                                                                                                                                                                                                                                                                                                                                                                                                                                                                                                                                                                                                                                                                                                                                                                                                                                                                                                                                                                                                                                                                                                                                                            |
| #11 | (#7 OR #8 OR #9) AND #10                                                                                                                                                                                                                                                                                                                                                                                                                                                                                                                                                                                                                                                                                                                                                                                                                                                                                                                                                                                                                                                                                                                                                                                                                                                                                                                                                                                                                                                                                                                                                                                                                                                                                      |

**Supplement 3. Screening pilot-test form****Level 1 screening**

1. Does the study include patients with intracranial stenosis?  
YES\_\_\_ NO\_\_\_ UNCLEAR\_\_\_
2. Were the patients treated with medical treatment alone, endovascular treatment, or extracranial-intracranial bypass?  
YES\_\_\_ NO\_\_\_ UNCLEAR\_\_\_
3. Were the patients treated with one of the above treatments compared to each other?  
YES\_\_\_ NO\_\_\_ UNCLEAR\_\_\_
4. Is this a relevant study design (e.g., experimental, quasi-experimental, observational studies)?  
YES\_\_\_ NO\_\_\_ UNCLEAR\_\_\_

If you answer NO to any of these questions, the citation will be excluded. All other citations will be included in L2 screening.

**Level 2 screening**

1. Does the study include patients with symptomatic intracranial stenosis ( $\geq 50\%$ ) ?  
YES\_\_\_ NO\_\_\_ UNCLEAR\_\_\_
2. Were the women treated with medical treatment alone, balloon angioplasty alone, balloon-mounted stent, self-expandable stent, or extracranial-intracranial bypass.  
YES\_\_\_ NO\_\_\_ UNCLEAR\_\_\_
3. Were the patients treated with one of the above treatments compared to each other?  
YES\_\_\_ NO\_\_\_ UNCLEAR\_\_\_

- 1  
2  
3 4. Does the study report at least one of our safety outcomes of interest (e.g., short-term mortality or  
4 stroke rate (peri-procedural, or mean follow-up  $\leq 3$  month), long-term mortality or stroke rate (mean  
5 follow-up  $\geq 6$  month), long-term restenosis ( $\geq 50\%$  stenosis verified by angiography, mean follow-up  
6  $\geq 6$  month), TIA rate (short- or long-term), other major complications)?  
7  
8  
9

10  
11 YES\_\_\_\_ NO\_\_\_\_ UNCLEAR\_\_\_\_  
12

- 13  
14  
15 5. Is this a relevant study design (experimental, quasi-experimental, observational cohort, case-control  
16 or registry studies)?  
17

18  
19 YES\_\_\_\_ NO\_\_\_\_ UNCLEAR\_\_\_\_  
20  
21  
22

23 If you answer NO to any of these questions, the citation/study will be excluded. All other full-text articles  
24 will be included.  
25  
26  
27  
28  
29  
30  
31  
32  
33  
34  
35  
36  
37  
38  
39  
40  
41  
42  
43  
44  
45  
46  
47  
48  
49  
50  
51  
52  
53  
54  
55  
56  
57  
58  
59  
60



1  
2  
3  
4  
5 **Supplement 4.** Adapted Newcastle-Ottawa Scale for observational studies.

6 **1. Adapted Newcastle-Ottawa Scale for cohort studies:**

7 Note: A study can be awarded a maximum of one star for each numbered item within the Selection and  
8 Outcome categories. A maximum of two stars can be given for Comparability  
9

10  
11 **Selection**

12 1) Representativeness of the exposed cohort

- 13 a) truly representative of the average symptomatic intracranial stenosis in the community \*
- 14 b) somewhat representative of the average symptomatic intracranial stenosis in the community \*
- 15 c) selected group of patients
- 16 d) no description of the derivation of the cohort

17  
18 2) Selection of the non exposed cohort

- 19 a) drawn from the same community as the exposed cohort \*
- 20 b) drawn from a different source
- 21 c) no description of the derivation of the non exposed cohort

22  
23 3) Ascertainment of exposure

- 24 a) secure record (eg surgical records) \*
- 25 b) structured interview \*
- 26 c) written self report
- 27 d) no description

28  
29 4) Demonstration that outcome of interest was not present at start of study

- 30 a) yes \*
- 31 b) no

32  
33 **Comparability**

34 1) Comparability of cohorts on the basis of the design or analysis

- 35 a) study controls for treatments of symptomatic intracranial stenosis \*
- 36 b) study controls for any additional factor \* (This criteria could be modified to indicate specific  
37 control for a second important factor.)

38  
39 **Outcome**

40 1) Assessment of outcome

- 41 a) independent blind assessment \*
- 42 b) record linkage \*
- 43 c) self report
- 44 d) no description

45  
46 2) Was follow-up long enough for outcomes to occur

- 47 a) yes (select an adequate follow up period for outcome of interest) \*
- 48 b) no

49  
50 3) Adequacy of follow up of cohorts

- 51 a) complete follow up - all subjects accounted for \*
- 52 b) subjects lost to follow up unlikely to introduce bias - small number lost - > 80 % follow up, or  
53 description provided of those lost) \*
- 54 c) follow up rate < 80% and no description of those lost
- 55  
56  
57  
58  
59  
60

1  
2  
3  
4 d) no statement  
5  
6  
7

## 8 **2. Adapted Newcastle-Ottawa Scale for case-control studies:**

9  
10 Note: A study can be awarded a maximum of one star for each numbered item within the Selection and  
11 Exposure categories. A maximum of two stars can be given for Comparability.  
12

### 13 **Selection**

- 14  
15 1) Is the case definition adequate?  
16 a) yes, with independent validation \*  
17 b) yes, eg record linkage or based on self reports  
18 c) no description  
19  
20 2) Representativeness of the cases  
21 a) consecutive or obviously representative series of cases \*  
22 b) potential for selection biases or not stated  
23  
24 3) Selection of Controls  
25 a) community controls \*  
26 b) hospital controls  
27 c) no description  
28  
29 4) Definition of Controls  
30 a) no history of disease (endpoint) \*  
31 b) no description of source  
32

### 33 **Comparability**

- 34 1) Comparability of cases and controls on the basis of the design or analysis  
35 a) study controls for treatments of symptomatic intracranial stenosis \*  
36 b) study controls for any additional factor \* (This criteria could be modified to indicate specific  
37 control for a second important factor.)  
38

### 39 **Exposure**

- 40  
41 1) Ascertainment of exposure  
42 a) secure record (eg surgical records) \*  
43 b) structured interview where blind to case/control status \*  
44 c) interview not blinded to case/control status  
45 d) written self report or medical record only  
46 e) no description  
47  
48 2) Same method of ascertainment for cases and controls  
49 a) yes \*  
50 b) no  
51  
52 3) Non-Response rate  
53 a) same rate for both groups \*  
54 b) non respondents described  
55 c) rate different and no designation  
56  
57  
58  
59  
60

1  
2  
3  
4  
5  
6  
7  
8  
9  
10  
11  
12  
13  
14  
15  
16  
17  
18  
19  
20  
21  
22  
23  
24  
25  
26  
27  
28  
29  
30  
31  
32  
33  
34  
35  
36  
37  
38  
39  
40  
41  
42  
43  
44  
45  
46  
47  
48  
49  
50  
51  
52  
53  
54  
55  
56  
57  
58  
59  
60

For peer review only

## Note from the Editors: Instructions for reviewers of study protocols

---

Since launching in 2011, BMJ Open has published study protocols for planned or ongoing research studies. If data collection is complete, we will not consider the manuscript.

Publishing study protocols enables researchers and funding bodies to stay up to date in their fields by providing exposure to research activity that may not otherwise be widely publicised. This can help prevent unnecessary duplication of work and will hopefully enable collaboration. Publishing protocols in full also makes available more information than is currently required by trial registries and increases transparency, making it easier for others (editors, reviewers and readers) to see and understand any deviations from the protocol that occur during the conduct of the study.

The scientific integrity and the credibility of the study data depend substantially on the study design and methodology, which is why the study protocol requires a thorough peer-review.

*BMJ Open* will consider for publication protocols for any study design, including observational studies and systematic reviews.

Some things to keep in mind when reviewing the study protocol:

- Protocol papers should report planned or ongoing studies. The dates of the study should be included in the manuscript.
- Unfortunately we are unable to customize the reviewer report form for study protocols. As such, some of the items (i.e., those pertaining to results) on the form should be scored as Not Applicable (N/A).
- While some baseline data can be presented, there should be no results or conclusions present in the study protocol.
- For studies that are ongoing, it is generally the case that very few changes can be made to the methodology. As such, requests for revisions are generally clarifications for the rationale or details relating to the methods. If there is a major flaw in the study that would prevent a sound interpretation of the data, we would expect the study protocol to be rejected.

# BMJ Open

## Endovascular treatment for symptomatic intracranial artery stenosis: protocol for a systematic review and network meta-analysis

|                                 |                                                                                                                                                                                                                                                                                                                                                                                                                                                                                                                                                                                                                                                                                                                                                                                                       |
|---------------------------------|-------------------------------------------------------------------------------------------------------------------------------------------------------------------------------------------------------------------------------------------------------------------------------------------------------------------------------------------------------------------------------------------------------------------------------------------------------------------------------------------------------------------------------------------------------------------------------------------------------------------------------------------------------------------------------------------------------------------------------------------------------------------------------------------------------|
| Journal:                        | <i>BMJ Open</i>                                                                                                                                                                                                                                                                                                                                                                                                                                                                                                                                                                                                                                                                                                                                                                                       |
| Manuscript ID                   | bmjopen-2018-022359.R1                                                                                                                                                                                                                                                                                                                                                                                                                                                                                                                                                                                                                                                                                                                                                                                |
| Article Type:                   | Protocol                                                                                                                                                                                                                                                                                                                                                                                                                                                                                                                                                                                                                                                                                                                                                                                              |
| Date Submitted by the Author:   | 27-Mar-2018                                                                                                                                                                                                                                                                                                                                                                                                                                                                                                                                                                                                                                                                                                                                                                                           |
| Complete List of Authors:       | Wang, Tao; Xuanwu Hospital, Capital Medical University, Department of Neurosurgery<br>Wang, Xue; Xuanwu Hospital, Capital Medical University, Medical Library<br>Yang, Kun; Xuanwu Hospital, Capital Medical University, Department of Evidence-Based Medicine<br>Zhang, Jing; Xuanwu Hospital, Capital Medical University, Department of Neurology<br>Luo, Jichang; Xuanwu Hospital, Capital Medical University, Department of Neurosurgery<br>Gao, Peng; Xuanwu Hospital, Capital Medical University, Department of Neurosurgery<br>Ma, Yan; Xuanwu Hospital, Capital Medical University, Department of Neurosurgery<br>Jiao, Liqun; Xuanwu Hospital, Capital Medical University, Department of Neurosurgery<br>Ling, Feng; Xuanwu Hospital, Capital Medical University, Department of Neurosurgery |
| <b>Primary Subject Heading</b>: | Neurology                                                                                                                                                                                                                                                                                                                                                                                                                                                                                                                                                                                                                                                                                                                                                                                             |
| Secondary Subject Heading:      | Evidence based practice, Surgery                                                                                                                                                                                                                                                                                                                                                                                                                                                                                                                                                                                                                                                                                                                                                                      |
| Keywords:                       | endovascular treatment, balloon angioplasty, balloon-mounted stent, self-expanding stent, intracranial artery stenosis, network meta-analysis                                                                                                                                                                                                                                                                                                                                                                                                                                                                                                                                                                                                                                                         |
|                                 |                                                                                                                                                                                                                                                                                                                                                                                                                                                                                                                                                                                                                                                                                                                                                                                                       |

SCHOLARONE™  
Manuscripts

# Endovascular treatment for symptomatic intracranial artery stenosis: protocol for a systematic review and network meta-analysis

Tao Wang<sup>1#</sup>, Xue Wang<sup>2#</sup>, Kun Yang<sup>3</sup>, Jing Zhang<sup>4</sup>, Jichang Luo<sup>1</sup>, Peng Gao<sup>1</sup>, Yan Ma<sup>1</sup>, Liquan Jiao<sup>1\*</sup>, Feng Ling<sup>1</sup>

\* **Correspondence to** Liquan Jiao; e-mail: [liquanjiao@sina.cn](mailto:liquanjiao@sina.cn); telephone: +86-010-83198277; fax numbers: +86-010-83199233; Department of Neurosurgery, Xuanwu Hospital, Capital Medical University, No. 45 Changchun Street, Beijing, China (100053)

# These authors contributed equally to this article.

<sup>1</sup> Department of Neurosurgery, Xuanwu Hospital, Capital Medical University, No. 45 Changchun Street, Beijing, China

<sup>2</sup> Medical Library, Xuanwu Hospital, Capital Medical University, No. 45 Changchun Street, Beijing, China

<sup>3</sup> Department of Evidence-Based Medicine, Xuanwu Hospital, Capital Medical University, No. 45 Changchun Street, Beijing, China

<sup>4</sup> Department of Neurology, Xuanwu Hospital, Capital Medical University, No. 45 Changchun Street, Beijing, China

**Keywords:** Endovascular treatment, balloon angioplasty, balloon-mounted stent, self-expanding stent, intracranial artery stenosis, network meta-analysis.

**Word count:** 3247 words.

## Abstract

**Introduction** Atherosclerotic intracranial artery stenosis (ICAS) is one of most common causes of stroke, which is the second-leading cause of death worldwide. Medical, surgical, and endovascular therapy are three major treatments for ICAS. Currently, medical therapy is considered as the standard of care for most patients with ICAS, while extracranial to intracranial bypass is only used rare situations. Balloon angioplasty alone (BA), balloon-mounted stent (BMS), and self-expanding stent (SES), collectively called endovascular treatment, have showed promising potentials in treating specific subgroups of patients with symptomatic ICAS, however, their comparative safety and efficacy is still unclear. Therefore, a systematic review with network meta-analysis is needed to establish a hierarchy of these endovascular treatments.

**Methods and analysis** The Preferred Reporting Items for Systematic Review and Meta-Analysis Protocols was followed to establish this protocol. The search will be limited to studies published from January 1st, 2000 to the formal search date. Major databases including Cochrane Library, MEDLINE, EMBASE, Chinese Biomedical Literature Database, conference proceedings and grey literature database will be searched for clinical studies comparing at least two interventions for symptomatic ICAS patients. Primary outcomes include short- and long-term mortality or stroke rate. Random effects pairwise and network meta-analyses of included studies will be performed on STATA (Vision 14, StataCorp. 2015). The surface under the cumulative ranking curve and mean rank will be calculated in order to establish a hierarchy of the endovascular treatments. Evaluation of the risk of bias, heterogeneity, consistency, transitivity and quality of evidence will follow the recommendations of the Cochrane Handbook for Systematic Reviews of Interventions.

**Ethics and dissemination:** Ethics approval is not needed for systematic review is based on published studies. Study findings will be presented at international conferences and published on a peer-reviewed journal.

**PROSPERO registration number:** CRD42018084055.

### Strengths and limitations of this study

To the best of our knowledge, this study will be the first systematic review and network meta-analysis of safety and efficacy of three subtypes of endovascular treatment for patients with symptomatic intracranial stenosis.

Besides randomized controlled studies, observational studies will also be included in order to obtain sufficient data for the network meta-analysis and improve the precision of estimates of adverse events.

The present study has a clearly established aim, state of the art methods for data collection, quality evaluation and quantitative synthesis.

The major challenge may come from unexpected heterogeneity from observational study designs. Stringent evaluation of transitivity will be conducted before data pooling for network meta-analysis.



## Background

### Description of the condition

Stroke is currently the second-leading cause of death just behind ischemic heart disease, causing 6.2 million death in 2015 worldwide [1, 2]. Atherosclerotic intracranial artery stenosis (ICAS), one of most common causes of stroke, accounted for 10-54% of all ischemic strokes. Stroke mortality presented with regional variation, with a disproportionately high mortality in Asian countries, which might be partially attributable to higher prevalence of intracranial atherosclerosis these regions [3]. Great economic and family burden have been caused by stroke globally, especially in low- and middle-income countries [4].

### Description of the intervention

Contemporary treatments for ICAS can be broadly categorized into medical, surgical, and endovascular therapy. Currently, medical treatment remains the standard of care for patients with ICAS [5]. Aggressive medical management (i.e., dual anti-platelet therapy along with intensive modifiable risk factor management) is supported by the latest studies [6-8] and recommended as the first-line therapy for symptomatic ICAS by the American Heart Association stroke prevention guidelines [9]. Extracranial to intracranial bypass surgery (EC-IC bypass) has been used to treatment for ICAS since 1980s, but it was proven to be associated with a worse prognosis versus medical treatment for ICAS patients in a RCT published in 1985 [10]. Ever since, EC-IC bypass is used in very few situations, such as stenoses progressing to occlusions with major hemodynamic impairment or in non atherosclerotic lesions like Moyamoya disease [11]. Endovascular therapy, also called percutaneous transluminal angioplasty and stenting (PTAS), was adopted from management of coronary heart disease and the first cases of its use in ICAS were reported in the 1980s [12]. It was considered as a minimally-invasive approach to treat symptomatic ICAS patients and was found to have an acceptable periprocedural complication rate and potential benefit in initial studies [8, 13-15]. Although results of SAMMPRIS and VISSIT trials didn't favor the use of PTAS in ICAS patients, many neurovascular practitioners and academics still believe that there is a role for endovascular treatment of ICAD [16]. Specific subgroups of patients, for example, African-American, Asian and Hispanic patients [17-20], high-risk subgroup of patients who do not respond well to intensive medical treatment [21, 22], and patients with hypoperfusion symptoms [22], which still needs to be confirmed by future studies.

### Rationale for the current systematic review

Endovascular therapy can be generally divided into three subtypes: balloon angioplasty alone (BA), balloon-mounted stent (BMS), or self-expanding stent (SES) [23]. So far, none of them has been established to be the primary option of endovascular therapy for specific subgroups of ICAS patients. Early studies comparing BA with stent placement showed comparable recurrent stroke or mortality rate, but stent treatment showed a lower rate of postoperative residual stenosis [24, 25]. Comparable immediate procedural outcomes were reported by another study [26]. A recent study, however, reported a significantly higher mortality (17.6% vs. 8.4%,  $P < 0.001$ ) but no difference of iatrogenic stroke rate (3.4% vs. 3.6%,  $P = 0.826$ ) in BA group, compared to stent group [27]. Therefore, the safety and efficacy of BA versus stent placement is still unclear. As for the efficacy of

1 BMS versus SES, the restenosis rate was showed to be higher in the SES than the BMS group [28-  
2 30]. However, whether the other major complication rates are different between them is still needed  
3 to be clarified. In summary, a systematic review with network meta-analysis that allows for both  
4 direct and indirect comparisons of multiple interventions is needed to decide the comparative ef-  
5 fects of the three subtypes of endovascular therapy. To our knowledge, this kind of systematic re-  
6 view has not been previously completed.

## 10 **Objective**

11 The primary objectives of this study are to (1) determine both the safety and efficacy of different  
12 endovascular treatments (i.e., balloon angioplasty alone, balloon-mounted stent or self-expanding  
13 stent) on patients with symptomatic intracranial artery stenosis, and (2) establish a hierarchy of  
14 endovascular treatments for treating symptomatic intracranial artery stenosis, through a systematic  
15 review with network meta-analysis of randomized trials and observational studies.

## 20 **Methods**

21 This protocol was developed according to the Preferred Reporting Items for Systematic Review and  
22 Meta-Analysis Protocols (PRISMA-P) (see **Supplement 1**. PRISMA-P Checklist) [31]. This sys-  
23 tematic review has been perspectively registered on the PROSPERO database (CRD42018084055,  
24 available at [http://www.crd.york.ac.uk/PROSPERO/display\\_record.php?ID=CRD42018084055](http://www.crd.york.ac.uk/PROSPERO/display_record.php?ID=CRD42018084055)).  
25 Any revision of this protocol and the whole review process will be updated timely on the  
26 PROSPERO registration. The conduction and reporting of this systematic review will follow the  
27 recommendations of the Cochrane Handbook for Systematic Reviews of Interventions and the  
28 PRISMA extension statement for reporting of systematic reviews incorporating network meta-  
29 analyses of health care interventions [32, 33].

### 34 **Criteria for considering studies for this review**

#### 35 *Types of studies*

36 Randomized controlled trials (RCTs) and quasi-RCTs (non-blinded, interrupted time series)  
37 will be included. Observational cohort, case-control and registry studies will be included to  
38 obtain adequate statistical power, because rare outcomes will be included in our review and  
39 identifying these rare adverse events are important to assess the intervention safety, and  
40 RCTs lack adequate statistical power to evaluate these uncommon/rare safety outcomes due  
41 to Type II (i.e., false negative) error [34]. Other types of studies including case series and  
42 case reports will be excluded. Studies published in Chinese journals will not be considered  
43 due to inappropriate randomization procedures have been reported in many of these studies  
44 [35].

#### 49 *Types of participants*

50 Patients with symptomatic intracranial arterial stenosis (ICAS) and degree of stenosis more  
51 than 50% (verified by angiography) will be included. The stenosis is located in at least one  
52 major intracranial artery (intracranial internal carotid artery, vertebral artery, or basilar ar-  
53 tery and their major branches). ICAS patients with a transient ischemic attack (TIA) or  
54

stroke are defined as symptomatic. A TIA was defined as a transient episode of neurological dysfunction (focal weakness or language disturbance, transient monocular blindness, or required assistance in walking) caused by focal brain or retinal ischemia that lasts for at least 10 minutes but resolves within 24 hours [36]. Intracranial arterial stenosis related to the following factors will be excluded: arterial dissection, moya-moya disease, vasculitic disease, radiation-induced vasculopathy, fibromuscular dysplasia, sickle cell disease, neurofibromatosis, suspected vasospastic process, and suspected recanalized embolus.

### *Types of interventions*

All competing interventions including any endovascular treatment as well as non-endovascular treatment strategy that can be administered for symptomatic ICAS are eligible for the analysis. Studies comparing at least two of the following eligible interventions will be considered in the analysis. We assume that any of the eligible interventions are, in principle, jointly randomizable among any patients that meets the inclusion criteria. If we identify any interventions that we are not aware of, we will consider them as eligible and include them in the network after assessing their comparability with those named below.

#### 1. Interventions of direct interest

Studies that evaluated one or more of the following endovascular therapies, namely balloon angioplasty alone (BA), self-expanding stent (SES), and balloon-mounted stent (BMS) will be included. We will estimate the relative ranking of these interventions in the network meta-analysis according to primary outcomes.

#### 2. Inclusion of additional interventions to supplement the analysis

Studies that evaluated non-endovascular treatment, namely medical treatment alone, and extracranial-intracranial bypass, will also be included to increase the amount of available (indirect) information in the analysis.

### *Types of outcome measures*

Studies that reported at least one of the following outcomes will be included.

#### 1. Primary outcomes

(1) Short-term mortality or stroke rate (peri-procedural, or mean follow-up  $\leq$  3 month)

(2) Long-term mortality or stroke rate (mean follow-up  $\geq$  6 month)

#### 2. Secondary outcomes

(1) Long-term restenosis ( $\geq$  50% stenosis verified by angiography, mean follow-up  $\geq$  6 month)

(2) TIA rate (short- or long-term)

(3) Other major complications

### **Search methods for identification of studies**

Literature search will mainly be executed in three databases: MEDLINE, EMBASE, the Cochrane Central Register of Controlled Trials (CENTRAL). Search strategy has been drafted by an experienced librarian and revised by another librarian according to the Peer Review of Electronic Search Strategies checklist (see **Supplement 2**. Search strategy) [37]. The search will be limited to studies published from January 1st, 2000 to the formal search date. In addition, we will also search other databases such as Chinese Biomedical Literature Database (CBM), Web of Science (WOS), and Open Grey (OG), and conference proceedings for relevant abstracts, the ISRCTN registry (<http://www.isrctn.com>), government registries (<http://www.clinicaltrials.gov>), and World Health Organization registries (<http://www.who.int/trialsearch/>) for on-going and recently completed studies. There will be no restrictions on study type, language or publication type. We will search the bibliography of all included studies and request original data from the primary authors when necessary.

## Data collection and analysis

### *Selection of studies*

Two reviewers will independently complete the two levels of study screening and selection. In level one screening, reviewers will determine if a study is eligible for inclusion by screening the title and abstract of articles retrieved from the literature search. In level two screening, the full-text of articles retained from level one screening will then be obtained and those that meet the eligible criteria will be included. When multiple studies report data from the same study population, or multiple articles of the same study series are published in chronological order, the study with the interventions of direct interest or the largest sample size will be retained. Before each level of screening, a pilot-test, based on the pre-designed test forms (see **Supplement 3**. Screening pilot-test form; adapted from Tricco, et al. [38]), will be conducted to calculate inter-rater reliability and high agreement ( $\geq 80\%$ ) is required to launch the formal screening. Discrepancies between the two reviewers will be resolved by discussion or otherwise a third reviewer. In cases of any ambiguity or insufficient data, study authors will be contacted for further information.

### *Data extraction and management*

Similar with the screening process, data extraction will also be conducted by two reviewers, independently. A data abstraction form will be created in Excel and include two types of data:

1. Outcome data

Number of primary and secondary outcome events, total number of patients, the interventions being compared, and follow-up duration will be extracted from included studies. Arm level data will be extracted.

2. Data on potential effect modifiers

Data that may act as effect modifiers will be extracted from included studies, including: (1). study characteristics (e.g., study design, volume of study center, date of publication, journal of publication, study location(s), study funding); (2). population characteristics (e.g., mean or median age, proportion of male patients, degree of pre-

1 procedural stenosis, functional status at presentation, past medical history, drinking  
2 and smoking status, stenosis site of the intracranial artery); (3). intervention charac-  
3 teristics (e.g., placement success rate, residual stenosis).  
4  
5

6 And a similar pilot-test to calculate inter-rater reliability is required to confirm high agree-  
7 ment ( $\geq 80\%$ ) between two reviewers. Similarly, two reviewers will be resolve disagree-  
8 ments by discussion or otherwise a third reviewer. And we will contact study authors for  
9 further information in case of any ambiguity or insufficient data.  
10  
11

#### 12 *Assessment of risk of bias in included studies*

13 Similarly, two reviewers will independently assess risk of bias, and conflicts will be re-  
14 solved through discussion or otherwise a third reviewer. The risk of bias of RCTs and quasi-  
15 RCTs will be assessed with items in the Cochrane Collaboration's tool [32], while that of  
16 non-RCTs (observational cohort and case-control studies) will be assessed with the Newcas-  
17 tle-Ottawa Scale (see **Supplement 4**. Newcastle-Ottawa Scale) [39].  
18  
19  
20

#### 21 *Measures of treatment effect*

22 As primary and secondary outcomes are all dichotomous data, odds ratios (ORs) will be  
23 used as the measure of treatment effect. Relative treatment effects will be presented as the  
24 summary relative effect sizes (ORs) and associated 95% credible intervals (CIs) for each  
25 possible pairwise comparison. Relative treatment ranking will also be estimated using the  
26 surface under the cumulative ranking curve (SUCRA) and mean ranks [40].  
27  
28  
29

#### 30 *Dealing with missing data*

31 Some of the outcomes are assumed to be rare. Thus, zero events in one arm might be re-  
32 ported. In this case, 0.5 will be added to the numerator and 1 will be added to the denomina-  
33 tor. Studies reporting zero events in all arms for primary outcomes will be excluded [41,  
34 42]. When encountering missing data in the included studies, we will contact the study au-  
35 thors for these data first. If the data are still unavailable upon requests, we will impute miss-  
36 ing data using established methods, including informative missing odds ratios (IMORs) for  
37 dichotomous outcomes and informative missingness difference of means (IMDoM) for con-  
38 tinuous outcomes [43] [44]. Further more, a sensitivity analysis will be conduct to ensure  
39 that our imputations do not bias the final results [45].  
40  
41  
42  
43

#### 44 *Assessment of clinical and methodological heterogeneity and transitivity*

45 Across all eligible trials that compare each pair of interventions, descriptive statistics for  
46 potential effect modifiers described above (i.e., study, population and intervention charac-  
47 teristics) will be generated. We will assess the presence of clinical and methodological  
48 heterogeneity both within and across treatment comparisons by calculating the  $I^2$  within  
49 each pairwise comparison [46]. We will assess the assumption of transitivity across treat-  
50 ment comparisons by comparing the distribution of the potential effect modifiers across the  
51 different pairwise comparisons using boxplots or percentages [47, 48]. The above factors are  
52 ensured prior to conducting the following pairwise and network meta-analyses.  
53  
54  
55  
56

### 57 **Data synthesis**

As described above, if quantitative synthesis is not appropriate or the data are insufficient, the findings of our systematic review will be narratively reported. When quantitative analysis is plausible, the following pairwise and network meta-analyses will be conducted in STATA (Vision 14, StataCorp. 2015). We will first restrict our analysis to RCTs, then include data from quasi-RCTs, and finally, data from observational studies. This sequential approach of analyses will provide an understanding of the contribution of each type of study design to our summary estimates.

#### *Methods for direct treatment comparisons*

Initially, we will perform standard pairwise meta-analyses for every direct treatment comparison with at least two studies (see **Figure 1**). We will use Bayesian random-effects models to derive summary effect measures with associated 95% credible intervals [49]. The normal distribution will be used in the vague priors for all trial baselines, treatment effects, and between-study standard deviations.

#### *Methods for indirect and mixed comparisons*

We will perform network meta-analysis using the three-level hierarchical, random-effects model as described in Schmitz et al., due to both RCTs and non-RCTs are included [50]. The normal distribution will also be used as the vague priors. We will rank relative treatment effects using mean ranks and the SUCRA [40]. Rank-heat plots will be used to display the treatment rankings across multiple outcomes [51].

#### *Assessment of statistical inconsistency*

We will evaluate the inconsistency between direct and indirect data locally by using the loop-specific method [52, 53] and the node-splitting method [54], and globally by using the design-by-treatment interaction model [55].

#### *Investigation of heterogeneity and inconsistency and sensitivity analyses*

Subgroup analyses will be conducted to explore if sufficient data are available. The following effect modifiers will be included in subgroup analyses: age, sex, degree of pre-procedural stenosis, functional status at presentation, stenosis site of the intracranial artery. Network meta-regression will be used to explore the effect of study year and study country if more than 10 studies are available. Sensitivity analyses will be conducted to test the robustness of our study findings by incorporating only data from the following studies when adequate studies are available: RCTs, quasi-RCTs and cohort studies reporting effect measures that are adjusted for important confounders.

### **Patient and Public Involvement**

As the present study is a systematic review based on published data, patient and public are not involved in the study design, conduct, data analysis and result dissemination.

### **Discussion**

The main anticipated challenge for the present systematic review and network meta-analysis is incorporating both randomized and observational studies. The rationale for including non-randomized studies is to obtain adequate statistical power to evaluate the outcomes, especially for the rare com-

1  
2 plications, because only a small amount of randomized studies were identified through an experi-  
3 mental search for eligible studies. Given that observational studies have inherited methodological  
4 limitations compared to randomized studies, another challenge is ensuring the treatment compari-  
5 sons in our study maintain transitivity in our network meta-analyses while also remaining clinically  
6 meaningful to knowledge users.  
7

8  
9 It is expected that the study findings will address important questions about the relative safety and  
10 efficacy of different endovascular treatments for patients with symptomatic ICAS, allow patients  
11 and care-providers to make informed decisions, and provide comprehensive information for future  
12 study designs.  
13

### 14 **Ethics and dissemination**

15  
16 Ethics approval is not needed for systematic review is based on published studies. Study findings  
17 will be presented at international conferences and published on a peer-reviewed journal.  
18  
19

20  
21 **Contributors** LJ, FL and YM developed the initial idea for this study. XW, TW and KY developed and revised  
22 the search strategy. TW, JZ and PG finished the study design. LJ, FL and YM were consulted about clinical is-  
23 sues. TW, JL and KY contributed to the original draft. PG, JZ and XW were responsible for the revision of the  
24 draft. TW and XW contributed equally to this article. All of the authors approved the final work prior to submis-  
25 sion.  
26  
27

28 **Funding** This work was supported by the Ministry of Science and Technology of the People's Republic of China  
29 (2016YFC1301700). The funder has no role in study design, data analysis and writing the manuscript.  
30

31 **Competing interests** None declared.  
32  
33  
34  
35  
36  
37  
38  
39  
40  
41  
42  
43  
44  
45  
46  
47  
48  
49  
50  
51  
52  
53  
54  
55  
56  
57  
58  
59  
60

1  
2  
3  
4  
5 **Figure 1.** Network of all possible pairwise comparisons between the eligible interventions. BA: bal-  
6 loon angioplasty; BMS: balloon mounted stent; SES: self-expanding stent; EC-IC bypass: extracra-  
7 nial-intracranial bypass.  
8  
9  
10  
11  
12  
13  
14  
15  
16  
17  
18  
19  
20  
21  
22  
23  
24  
25  
26  
27  
28  
29  
30  
31  
32  
33  
34  
35  
36  
37  
38  
39  
40  
41  
42  
43  
44  
45  
46  
47  
48  
49  
50  
51  
52  
53  
54  
55  
56  
57  
58  
59  
60

For peer review only



## Reference

1. Banerjee, C. and M.I. Chimowitz, Stroke Caused by Atherosclerosis of the Major Intracranial Arteries. *Circ Res*, 2017. **120**(3): p. 502-513.
2. WHO, Global Health Observatory (GHO) data. 2017: WHO.
3. Johnston, S.C., S. Mendis, and C.D. Mathers, Global variation in stroke burden and mortality: estimates from monitoring, surveillance, and modelling. *Lancet Neurol*, 2009. **8**(4): p. 345-54.
4. Gretarsdottir, S., et al., Risk variants for atrial fibrillation on chromosome 4q25 associate with ischemic stroke. *Ann Neurol*, 2008. **64**(4): p. 402-9.
5. van den Wijngaard, I.R., et al., Treatment and imaging of intracranial atherosclerotic stenosis: current perspectives and future directions. *Brain Behav*, 2016. **6**(11): p. e00536.
6. Derdeyn, C.P., et al., Aggressive medical treatment with or without stenting in high-risk patients with intracranial artery stenosis (SAMMPRIS): the final results of a randomised trial. *Lancet*, 2014. **383**(9914): p. 333-41.
7. Leung, T.W., et al., Evolution of intracranial atherosclerotic disease under modern medical therapy. *Ann Neurol*, 2015. **77**(3): p. 478-86.
8. Zaidat, O.O., et al., Effect of a balloon-expandable intracranial stent vs medical therapy on risk of stroke in patients with symptomatic intracranial stenosis: the VISSIT randomized clinical trial. *JAMA*, 2015. **313**(12): p. 1240-8.
9. Kernan, W.N., et al., Guidelines for the prevention of stroke in patients with stroke and transient ischemic attack: a guideline for healthcare professionals from the American Heart Association/American Stroke Association. *Stroke*, 2014. **45**(7): p. 2160-236.
10. Group, E.I.B.S., Failure of extracranial-intracranial arterial bypass to reduce the risk of ischemic stroke. Results of an international randomized trial. *N Engl J Med*, 1985. **313**(19): p. 1191-200.
11. Reith, W., et al., Diagnosis and Treatment of Intracranial Stenoses. *Clin Neuroradiol*, 2015. **25 Suppl 2**: p. 307-16.
12. Sundt, T.M., Jr., et al., Transluminal angioplasty for basilar artery stenosis. *Mayo Clin Proc*, 1980. **55**(11): p. 673-80.
13. Wong, K.S., et al., Clopidogrel plus aspirin versus aspirin alone for reducing embolisation in patients with acute symptomatic cerebral or carotid artery stenosis (CLAIR study): a randomised, open-label, blinded-endpoint trial. *Lancet Neurol*, 2010. **9**(5): p. 489-97.
14. Derdeyn, C.P., et al., Aggressive medical treatment with or without stenting in high-risk patients with intracranial artery stenosis (SAMMPRIS): the final results of a randomised trial. *The Lancet*, 2014. **383**(9914): p. 333-341.
15. Turan, T.N., et al., Intracranial stenosis: impact of randomized trials on treatment preferences of US neurologists and neurointerventionists. *Cerebrovasc Dis*, 2014. **37**(3): p. 203-11.
16. Zaidat, O., et al., Impact of SAMMPRIS on the future of intracranial atherosclerotic disease management: polling results from the ICAD symposium at the International Stroke Conference. 2014. **6**(3): p. 225-230.
17. Sacco, R.L., et al., Race-ethnicity and determinants of intracranial atherosclerotic cerebral infarction. The Northern Manhattan Stroke Study. *Stroke*, 1995. **26**(1): p. 14-20.
18. Liu, H.M., et al., Evaluation of intracranial and extracranial carotid steno-occlusive diseases in Taiwan Chinese patients with MR angiography: preliminary experience. *Stroke*, 1996. **27**(4): p. 650-3.
19. White, H., et al., Ischemic stroke subtype incidence among whites, blacks, and Hispanics: the Northern Manhattan Study. *Circulation*, 2005. **111**(10): p. 1327-31.

- 1 20. Wang, Y., et al., Prevalence and outcomes of symptomatic intracranial large artery stenoses  
2 and occlusions in China: the Chinese Intracranial Atherosclerosis (CICAS) Study. *Stroke*, 2014.  
3 **45**(3): p. 663-9.
- 4 21. Abou-Chebl, A. and H. Steinmetz, Critique of "Stenting versus aggressive medical therapy  
5 for intracranial arterial stenosis" by Chimowitz et al in the new England Journal of Medicine.  
6 *Stroke*, 2012. **43**(2): p. 616-20.
- 7 22. Gao, P., et al., China Angioplasty and Stenting for Symptomatic Intracranial Severe Stenosis  
8 (CASSISS): A new, prospective, multicenter, randomized controlled trial in China. *Interv Neuro-*  
9 *radiol*, 2015. **21**(2): p. 196-204.
- 10 23. Tebeb, M.S., et al., Endovascular management of intracranial atherosclerosis. *Neurosurg*  
11 *Clin N Am*, 2014. **25**(3): p. 593-605.
- 12 24. Qureshi, A.I., et al., Concurrent comparison of outcomes of primary angioplasty and of stent  
13 placement in high-risk patients with symptomatic intracranial stenosis. *Neurosurgery*, 2008. **62**(5):  
14 p. 1053-60; discussion 1060-2.
- 15 25. Siddiq, F., et al., Comparison of primary angioplasty with stent placement for treating symp-  
16 tomatic intracranial atherosclerotic diseases: a multicenter study. *Stroke*, 2008. **39**(9): p. 2505-10.
- 17 26. Qureshi, A.I., et al., A randomized trial comparing primary angioplasty versus stent place-  
18 ment for symptomatic intracranial stenosis. *J Vasc Interv Neurol*, 2013. **6**(2): p. 34-41.
- 19 27. Villwock, M.R., et al., Primary Angioplasty Versus Stenting for Endovascular Management  
20 of Intracranial Atherosclerotic Disease Following Acute Ischemic Stroke. *J Vasc Interv Neurol*,  
21 2016. **9**(1): p. 1-6.
- 22 28. Yue, X., et al., Comparison of BMSs with SES for symptomatic intracranial disease of the  
23 middle cerebral artery stenosis. *Cardiovasc Intervent Radiol*, 2011. **34**(1): p. 54-60.
- 24 29. Park, S., et al., Intracranial stenting for severe symptomatic stenosis: self-expandable versus  
25 balloon-expandable stents. *Interv Neuroradiol*, 2013. **19**(3): p. 276-82.
- 26 30. Miao, Z., et al., Outcomes of tailored angioplasty and/or stenting for symptomatic intracra-  
27 nial atherosclerosis: a prospective cohort study after SAMMPRIS. *J Neurointerv Surg*, 2015. **7**(5):  
28 p. 331-5.
- 29 31. Shamseer, L., et al., Preferred reporting items for systematic review and meta-analysis pro-  
30 tocols (PRISMA-P) 2015: elaboration and explanation. *Bmj*, 2015. **350**: p. g7647.
- 31 32. Higgins JPT, G.S., *Cochrane Handbook for Systematic Reviews of Interventions Version*  
32 *5.1.0 [updated March 2011]*. The Cochrane Collaboration, 2011: p. Available from:  
33 <http://handbook.cochrane.org/>.
- 34 33. Hutton, B., et al., The PRISMA extension statement for reporting of systematic reviews in-  
35 corporating network meta-analyses of health care interventions: checklist and explanations. *Ann*  
36 *Intern Med*, 2015. **162**(11): p. 777-84.
- 37 34. Eypasch, E., et al., Probability of adverse events that have not yet occurred: a statistical re-  
38 minder. *Bmj*, 1995. **311**(7005): p. 619-20.
- 39 35. Wu TX, L.Y., Liu GJ, et al., Investigation of authenticity of 'claimed' randomized con-  
40 trolled trials (RCTs) and quality assessment of RCT reports published in China. 2006: Dublin, Ire-  
41 land.
- 42 36. Easton, J.D., et al., Definition and evaluation of transient ischemic attack: a scientific state-  
43 ment for healthcare professionals from the American Heart Association/American Stroke Associa-  
44 tion Stroke Council; Council on Cardiovascular Surgery and Anesthesia; Council on Cardiovascular  
45 Radiology and Intervention; Council on Cardiovascular Nursing; and the Interdisciplinary Council  
46 on Peripheral Vascular Disease. The American Academy of Neurology affirms the value of this  
47 statement as an educational tool for neurologists. *Stroke*, 2009. **40**(6): p. 2276-93.
- 48 37. Sampson Jacinda, B., O. Vardeny, and M. Flanigan Kevin Aminoglycosides and other non-  
49 sense suppression therapies for the treatment of dystrophinopathy. *Cochrane Database of Systemat-*  
50 *ic Reviews*, 2009. DOI: 10.1002/14651858.CD007985.

- 1 38. Tricco, A.C., et al., Comparative safety of anti-epileptic drugs among infants and children  
2 exposed in utero or during breastfeeding: protocol for a systematic review and network meta-  
3 analysis. *Syst Rev*, 2014. **3**: p. 68.
- 4 39. Wells GA, S.B., O'Connell D, Peterson J, Welch V, Losos M, et al., The Newcastle-Ottawa  
5 Scale (NOS) for assessing the quality of nonrandomised studies in meta-analyses. 2010: p. Availa-  
6 ble from: [http://www.ohri.ca/programs/clinical\\_epidemiology/oxford.asp](http://www.ohri.ca/programs/clinical_epidemiology/oxford.asp).
- 7 40. Salanti, G., A.E. Ades, and J.P. Ioannidis, Graphical methods and numerical summaries for  
8 presenting results from multiple-treatment meta-analysis: an overview and tutorial. *J Clin*  
9 *Epidemiol*, 2011. **64**(2): p. 163-71.
- 10 41. Sweeting, M.J., A.J. Sutton, and P.C. Lambert, What to add to nothing? Use and avoidance  
11 of continuity corrections in meta-analysis of sparse data. *Stat Med*, 2004. **23**(9): p. 1351-75.
- 12 42. Bradburn, M.J., et al., Much ado about nothing: a comparison of the performance of meta-  
13 analytical methods with rare events. *Stat Med*, 2007. **26**(1): p. 53-77.
- 14 43. Spineli, L.M., et al., Evaluating the impact of imputations for missing participant outcome  
15 data in a network meta-analysis. *Clin Trials*, 2013. **10**(3): p. 378-88.
- 16 44. Mavridis, D., et al., Allowing for uncertainty due to missing continuous outcome data in  
17 pairwise and network meta-analysis. *Stat Med*, 2015. **34**(5): p. 721-41.
- 18 45. Carpenter, J., G. Rucker, and G. Schwarzer, Assessing the sensitivity of meta-analysis to  
19 selection bias: a multiple imputation approach. *Biometrics*, 2011. **67**(3): p. 1066-72.
- 20 46. Jackson, D., et al., A design-by-treatment interaction model for network meta-analysis with  
21 random inconsistency effects. *Stat Med*, 2014. **33**(21): p. 3639-54.
- 22 47. Salanti, G., Indirect and mixed-treatment comparison, network, or multiple-treatments meta-  
23 analysis: many names, many benefits, many concerns for the next generation evidence synthesis  
24 tool. *Res Synth Methods*, 2012. **3**(2): p. 80-97.
- 25 48. Jansen, J.P. and H. Naci, Is network meta-analysis as valid as standard pairwise meta-  
26 analysis? It all depends on the distribution of effect modifiers. *BMC Med*, 2013. **11**: p. 159.
- 27 49. Sutton, A.J. and K.R. Abrams, Bayesian methods in meta-analysis and evidence synthesis.  
28 *Stat Methods Med Res*, 2001. **10**(4): p. 277-303.
- 29 50. Schmitz, S., R. Adams, and C. Walsh, Incorporating data from various trial designs into a  
30 mixed treatment comparison model. *Stat Med*, 2013. **32**(17): p. 2935-49.
- 31 51. Veroniki, A.A., et al., The rank-heat plot is a novel way to present the results from a net-  
32 work meta-analysis including multiple outcomes. *J Clin Epidemiol*, 2016. **76**: p. 193-9.
- 33 52. Song, F., et al., Validity of indirect comparison for estimating efficacy of competing inter-  
34 ventions: empirical evidence from published meta-analyses. *Bmj*, 2003. **326**(7387): p. 472.
- 35 53. Veroniki, A.A., et al., Evaluation of inconsistency in networks of interventions. *Int J*  
36 *Epidemiol*, 2013. **42**(1): p. 332-45.
- 37 54. Dias, S., et al., Checking consistency in mixed treatment comparison meta-analysis. *Stat*  
38 *Med*, 2010. **29**(7-8): p. 932-44.
- 39 55. White, I.R., et al., Consistency and inconsistency in network meta-analysis: model estima-  
40 tion using multivariate meta-regression. *Res Synth Methods*, 2012. **3**(2): p. 111-25.
- 41
- 42
- 43
- 44
- 45
- 46
- 47
- 48
- 49
- 50
- 51
- 52
- 53
- 54
- 55
- 56
- 57
- 58
- 59
- 60

1  
2  
3  
4  
5  
6  
7  
8  
9  
10  
11  
12  
13  
14  
15  
16  
17  
18  
19  
20  
21  
22  
23  
24  
25  
26  
27  
28  
29  
30  
31  
32  
33  
34  
35  
36  
37  
38  
39  
40  
41  
42  
43  
44  
45  
46  
47  
48  
49  
50  
51  
52  
53  
54  
55  
56  
57  
58  
59  
60

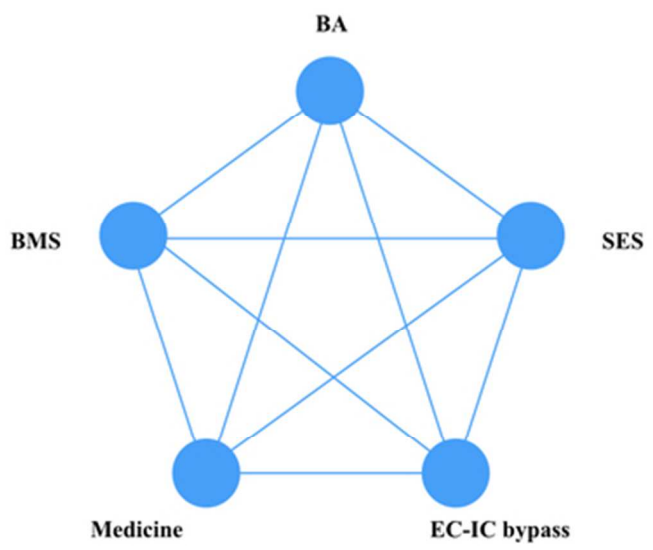

Network of all possible pairwise comparisons between the eligible interventions. BA: balloon angioplasty; BMS: balloon mounted stent; SES: self-expanding stent; EC-IC bypass: extracranial-intracranial bypass.

48x36mm (300 x 300 DPI)

For peer review only

**Supplement 1.** PRISMA-P (Preferred Reporting Items for Systematic review and Meta-Analysis Protocols) 2015 checklist: recommended items to address in a systematic review protocol\*

| Section and topic                 | Item No | Checklist item                                                                                                                                                                                  | Check results                              |
|-----------------------------------|---------|-------------------------------------------------------------------------------------------------------------------------------------------------------------------------------------------------|--------------------------------------------|
| <b>ADMINISTRATIVE INFORMATION</b> |         |                                                                                                                                                                                                 |                                            |
| Title:                            |         |                                                                                                                                                                                                 |                                            |
| Identification                    | 1a      | Identify the report as a protocol of a systematic review                                                                                                                                        | Yes<br>Page 1, line 2                      |
| Update                            | 1b      | If the protocol is for an update of a previous systematic review, identify as such                                                                                                              | N/A                                        |
| Registration                      | 2       | If registered, provide the name of the registry (such as PROSPERO) and registration number                                                                                                      | Yes<br>Page 2, line 35;<br>Page 5, line 26 |
| Authors:                          |         |                                                                                                                                                                                                 |                                            |
| Contact                           | 3a      | Provide name, institutional affiliation, e-mail address of all protocol authors; provide physical mailing address of corresponding author                                                       | Yes<br>Page 1, line 11                     |
| Contributions                     | 3b      | Describe contributions of protocol authors and identify the guarantor of the review                                                                                                             | Yes<br>Page 10, line 17                    |
| Amendments                        | 4       | If the protocol represents an amendment of a previously completed or published protocol, identify as such and list changes; otherwise, state plan for documenting important protocol amendments | Yes<br>Page 5, line 28                     |
| Support:                          |         |                                                                                                                                                                                                 |                                            |
| Sources                           | 5a      | Indicate sources of financial or other support for the review                                                                                                                                   | Yes<br>Page 10, line 24                    |
| Sponsor                           | 5b      | Provide name for the review funder and/or sponsor                                                                                                                                               | Yes<br>Page 10, line 24                    |

|                           |    |                                                                                                    |                         |
|---------------------------|----|----------------------------------------------------------------------------------------------------|-------------------------|
| Role of sponsor or funder | 5c | Describe roles of funder(s), sponsor(s), and/or institution(s), if any, in developing the protocol | Yes<br>Page 10, line 25 |
|---------------------------|----|----------------------------------------------------------------------------------------------------|-------------------------|

**INTRODUCTION**

|            |   |                                                                                                                                                          |                        |
|------------|---|----------------------------------------------------------------------------------------------------------------------------------------------------------|------------------------|
| Rationale  | 6 | Describe the rationale for the review in the context of what is already known                                                                            | Yes<br>Page 4, line 44 |
| Objectives | 7 | Provide an explicit statement of the question(s) the review will address with reference to participants, interventions, comparators, and outcomes (PICO) | Yes<br>Page 5, line 10 |

**METHODS**

|                      |    |                                                                                                                                                                                                                               |                        |
|----------------------|----|-------------------------------------------------------------------------------------------------------------------------------------------------------------------------------------------------------------------------------|------------------------|
| Eligibility criteria | 8  | Specify the study characteristics (such as PICO, study design, setting, time frame) and report characteristics (such as years considered, language, publication status) to be used as criteria for eligibility for the review | Yes<br>Page 5, line 35 |
| Information sources  | 9  | Describe all intended information sources (such as electronic databases, contact with study authors, trial registers or other grey literature sources) with planned dates of coverage                                         | Yes<br>Page 7, line 1  |
| Search strategy      | 10 | Present draft of search strategy to be used for at least one electronic database, including planned limits, such that it could be repeated                                                                                    | Yes<br>Page 7, line 6  |

Study records:

|                         |     |                                                                                                                                                                                                 |                        |
|-------------------------|-----|-------------------------------------------------------------------------------------------------------------------------------------------------------------------------------------------------|------------------------|
| Data management         | 11a | Describe the mechanism(s) that will be used to manage records and data throughout the review                                                                                                    | Yes<br>Page 7, line 39 |
| Selection process       | 11b | State the process that will be used for selecting studies (such as two independent reviewers) through each phase of the review (that is, screening, eligibility and inclusion in meta-analysis) | Yes<br>Page 7, line 20 |
| Data collection process | 11c | Describe planned method of extracting data from reports (such as piloting forms, done independently, in duplicate), any processes for obtaining and confirming data from investigators          | Yes<br>Page 7, line 39 |

|                                    |     |                                                                                                                                                                                                                                                  |                                            |
|------------------------------------|-----|--------------------------------------------------------------------------------------------------------------------------------------------------------------------------------------------------------------------------------------------------|--------------------------------------------|
| Data items                         | 12  | List and define all variables for which data will be sought (such as PICO items, funding sources), any pre-planned data assumptions and simplifications                                                                                          | Yes<br>Page 7, line 45;<br>Page 7, line 52 |
| Outcomes and prioritization        | 13  | List and define all outcomes for which data will be sought, including prioritization of main and additional outcomes, with rationale                                                                                                             | Yes<br>Page 6, line 37                     |
| Risk of bias in individual studies | 14  | Describe anticipated methods for assessing risk of bias of individual studies, including whether this will be done at the outcome or study level, or both; state how this information will be used in data synthesis                             | Yes<br>Page 8, line 12                     |
| Data synthesis                     | 15a | Describe criteria under which study data will be quantitatively synthesised                                                                                                                                                                      | Yes<br>Page 8, line 44                     |
|                                    | 15b | If data are appropriate for quantitative synthesis, describe planned summary measures, methods of handling data and methods of combining data from studies, including any planned exploration of consistency (such as $I^2$ , Kendall's $\tau$ ) | Yes<br>Page 8, line 56                     |
|                                    | 15c | Describe any proposed additional analyses (such as sensitivity or subgroup analyses, meta-regression)                                                                                                                                            | Yes<br>Page 9, line 34                     |
|                                    | 15d | If quantitative synthesis is not appropriate, describe the type of summary planned                                                                                                                                                               | Yes<br>Page 9, line 2                      |
| Meta-bias(es)                      | 16  | Specify any planned assessment of meta-bias(es) (such as publication bias across studies, selective reporting within studies)                                                                                                                    | Yes<br>Page 9, line 34                     |
| Confidence in cumulative evidence  | 17  | Describe how the strength of the body of evidence will be assessed (such as GRADE)                                                                                                                                                               | Yes<br>Page 5, line 30                     |

**\* It is strongly recommended that this checklist be read in conjunction with the PRISMA-P Explanation and Elaboration (cite when available) for important clarification on the items. Amendments to a review protocol should be tracked and dated. The copyright for PRISMA-P (including checklist) is held by the PRISMA-P Group and is distributed under a Creative Commons Attribution Licence 4.0.**

1  
2  
3  
4  
5  
6  
7  
8  
9  
10  
11  
12  
13  
14  
15  
16  
17  
18  
19  
20  
21  
22  
23  
24  
25  
26  
27  
28  
29  
30  
31  
32  
33  
34  
35  
36  
37  
38  
39  
40  
41  
42  
43  
44  
45  
46

*From: Shamseer L, Moher D, Clarke M, Ghersi D, Liberati A, Petticrew M, Shekelle P, Stewart L, PRISMA-P Group. Preferred reporting items for systematic review and meta-analysis protocols (PRISMA-P) 2015: elaboration and explanation. BMJ. 2015 Jan 2;349(jan02 1):g7647.*



1  
2  
3  
4  
5  
6  
7  
8  
9  
10  
11  
12  
13  
14  
15  
16  
17  
18  
19  
20  
21  
22  
23  
24  
25  
26  
27  
28  
29  
30  
31  
32  
33  
34  
35  
36  
37  
38  
39  
40  
41  
42  
43  
44  
45  
46  
47  
48  
49  
50  
51  
52  
53  
54  
55  
56  
57  
58  
59  
60

**Supplement 2. Search strategy.**

| Search step | Search terms                                                                                                                                                                                                                                                                                                                                                                                                                                                                                                                                                                                                                                                                                                                                                                                                                                                                                                                                                                                                                    |
|-------------|---------------------------------------------------------------------------------------------------------------------------------------------------------------------------------------------------------------------------------------------------------------------------------------------------------------------------------------------------------------------------------------------------------------------------------------------------------------------------------------------------------------------------------------------------------------------------------------------------------------------------------------------------------------------------------------------------------------------------------------------------------------------------------------------------------------------------------------------------------------------------------------------------------------------------------------------------------------------------------------------------------------------------------|
| #1          | ((((((((((((((((("Intracranial Arterial Diseases"[Mesh]) AND "Constriction, Pathologic"[Mesh]) OR "Intracranial Arteriosclerosis"[Mesh]) OR intracranial arterial stenosis) OR intracranial atherosclerosis) OR intracranial stenosis) OR intracranial atherosclerotic stenosis) OR intracranial atherosclerotic diseases) OR "Vertebrobasilar Insufficiency"[Mesh]) OR intracranial vertebral artery stenosis) OR intracranial vertebrobasilar artery stenosis) OR ischemic cerebrovascular disease caused by artery stenosis) OR basilar artery stenosis) OR cerebral artery stenosis) OR vertebral artery stenosis) OR atherosclerotic vertebrobasilar artery occlusion) OR (intracranial large artery stenoses and occlusions)) OR (intracranial large artery stenosis and occlusions)) OR intracranial vertebral artery atherosclerotic stenosis) OR vertebral atherosclerotic diseases) OR vertebral atherosclerosis diseases) OR intracranial internal carotid artery stenosis) OR atherosclerotic intracranial stenosis |
| #2          | (((balloon expandable intracranial stent*) OR balloon expandable stent*) OR balloon dilatable stent*) OR balloon mounted stent*) OR balloon angioplasty with stent*                                                                                                                                                                                                                                                                                                                                                                                                                                                                                                                                                                                                                                                                                                                                                                                                                                                             |
| #3          | (((self expanding stent*) OR self expanded stent*) OR self expandable stent*) OR primary stent*                                                                                                                                                                                                                                                                                                                                                                                                                                                                                                                                                                                                                                                                                                                                                                                                                                                                                                                                 |
| #4          | (((((((balloon angioplasty) OR balloon dilatation) OR balloon dilation) OR primary angioplasty) OR intracranial angioplasty alone) OR endovascular treatment alone) OR endovascular therapy alone) OR intravascular treatment alone) OR intravascular therapy alone                                                                                                                                                                                                                                                                                                                                                                                                                                                                                                                                                                                                                                                                                                                                                             |

|     |                                                                                                                                                                                                                                                                                                                                                                                                                                                                                                                                                                                                                                                                                                                                                                                                                                                                                                                                                                                                                                                                                                                                                                                                                                                                                                                                                                                                                                                                                                                                                                                                                                                                                                                           |
|-----|---------------------------------------------------------------------------------------------------------------------------------------------------------------------------------------------------------------------------------------------------------------------------------------------------------------------------------------------------------------------------------------------------------------------------------------------------------------------------------------------------------------------------------------------------------------------------------------------------------------------------------------------------------------------------------------------------------------------------------------------------------------------------------------------------------------------------------------------------------------------------------------------------------------------------------------------------------------------------------------------------------------------------------------------------------------------------------------------------------------------------------------------------------------------------------------------------------------------------------------------------------------------------------------------------------------------------------------------------------------------------------------------------------------------------------------------------------------------------------------------------------------------------------------------------------------------------------------------------------------------------------------------------------------------------------------------------------------------------|
| #5  | ((((((((((((("Drug Therapy"[Mesh]) OR drug therapy) OR pharmacotherapy) OR chemotherapy) OR medication)) OR (((((((((((((((("Aspirin"[Mesh]) OR aspirin) OR acetylsalicylic acid) OR ASA) OR "2-acetyloxy benzoic acid") OR acylpyrin) OR aloxiprinum) OR colfarit) OR disopril) OR ecotrin) OR endosprin) OR magnecyl) OR micristin) OR polopirin) OR polopiryna) OR solprins) OR solupsan) OR zorprin) OR acetysal)) OR (((((((((((("clopidogrel" [Supplementary Concept]) OR clopidogrel) OR iscover) OR pcr 4099) OR pcr-4099) OR pcr4099) OR plavix) OR sr 25989) OR sr-25989) OR sr25989) OR sr 25990c) OR sr-25990c) OR sr25990c)) OR (((((((((((("Warfarin"[Mesh]) OR warfarin) OR aldocumar) OR warfant) OR coumadin) OR coumarin) OR marevan) OR coumadine) OR tedicumar) OR jantoven) OR waran)) OR (((((((((((("cilostazol" [Supplementary Concept]) OR cilostazol) OR pletal) OR pletaal) OR OPC 13013) OR OPC-13013) OR OPC13013) OR OPC 21) OR OPC-21) OR OPC21)) OR (((((((("Ticagrelor" [Supplementary Concept]) OR ticagrelor) OR brilinta) OR brilique) OR AZD 6140) OR AZD-6140) OR AZD6140)) OR (((((((((((("Ticlopidine"[Mesh]) OR ticlopidine) OR ticlid) OR tiklid) OR ticlodix) OR ticlodone) OR panaldine) OR 53 32C) OR 53-32C) OR 5332C)) OR (((((((((((("Prasugrel Hydrochloride"[Mesh]) OR prasugrel) OR efient) OR effient) OR CS 747) OR CS-747) OR CS747) OR LY 640315) OR LY-640315) OR LY640315)) OR (((("Thienopyridines"[Mesh]) OR thienopyridine) OR thienopyridines)) OR (((((((("Aspirin, Dipyridamole Drug Combination"[Mesh]) OR aspirin-dipyridamole drug combination) OR aspirin dipyridamole drug combination) OR TX 3301) OR TX-3301) OR TX3301) OR asasantin) OR aggrenox) |
| #6  | ((((((((("Cerebral Revascularization"[Mesh]) OR extracranial-intracranial) OR extracranial intracranial) OR extra-intracranial) OR extra intracranial) OR EC-IC) OR ECIC) OR graft) OR bypass) OR bypasses                                                                                                                                                                                                                                                                                                                                                                                                                                                                                                                                                                                                                                                                                                                                                                                                                                                                                                                                                                                                                                                                                                                                                                                                                                                                                                                                                                                                                                                                                                                |
| #7  | #1 AND #2 AND #3 AND #4                                                                                                                                                                                                                                                                                                                                                                                                                                                                                                                                                                                                                                                                                                                                                                                                                                                                                                                                                                                                                                                                                                                                                                                                                                                                                                                                                                                                                                                                                                                                                                                                                                                                                                   |
| #8  | #1 AND (#2 OR #3 OR #4)                                                                                                                                                                                                                                                                                                                                                                                                                                                                                                                                                                                                                                                                                                                                                                                                                                                                                                                                                                                                                                                                                                                                                                                                                                                                                                                                                                                                                                                                                                                                                                                                                                                                                                   |
| #9  | #1 AND #5 AND #6                                                                                                                                                                                                                                                                                                                                                                                                                                                                                                                                                                                                                                                                                                                                                                                                                                                                                                                                                                                                                                                                                                                                                                                                                                                                                                                                                                                                                                                                                                                                                                                                                                                                                                          |
| #10 | Filters: Publication date from 2000/01/01; English                                                                                                                                                                                                                                                                                                                                                                                                                                                                                                                                                                                                                                                                                                                                                                                                                                                                                                                                                                                                                                                                                                                                                                                                                                                                                                                                                                                                                                                                                                                                                                                                                                                                        |
| #11 | (#7 OR #8 OR #9) AND #10                                                                                                                                                                                                                                                                                                                                                                                                                                                                                                                                                                                                                                                                                                                                                                                                                                                                                                                                                                                                                                                                                                                                                                                                                                                                                                                                                                                                                                                                                                                                                                                                                                                                                                  |

**Supplement 3. Screening pilot-test form****Level 1 screening**

1. Does the study include patients with intracranial stenosis?  
YES\_\_\_ NO\_\_\_ UNCLEAR\_\_\_
2. Were the patients treated with medical treatment alone, endovascular treatment, or extracranial-intracranial bypass?  
YES\_\_\_ NO\_\_\_ UNCLEAR\_\_\_
3. Were the patients treated with one of the above treatments compared to each other?  
YES\_\_\_ NO\_\_\_ UNCLEAR\_\_\_
4. Is this a relevant study design (e.g., experimental, quasi-experimental, observational studies)?  
YES\_\_\_ NO\_\_\_ UNCLEAR\_\_\_

If you answer NO to any of these questions, the citation will be excluded. All other citations will be included in L2 screening.

**Level 2 screening**

1. Does the study include patients with symptomatic intracranial stenosis ( $\geq 50\%$ ) ?  
YES\_\_\_ NO\_\_\_ UNCLEAR\_\_\_
2. Were the women treated with medical treatment alone, balloon angioplasty alone, balloon-mounted stent, self-expandable stent, or extracranial-intracranial bypass.  
YES\_\_\_ NO\_\_\_ UNCLEAR\_\_\_
3. Were the patients treated with one of the above treatments compared to each other?  
YES\_\_\_ NO\_\_\_ UNCLEAR\_\_\_

- 1  
2  
3 4. Does the study report at least one of our safety outcomes of interest (e.g., short-term mortality or  
4 stroke rate (peri-procedural, or mean follow-up  $\leq 3$  month), long-term mortality or stroke rate (mean  
5 follow-up  $\geq 6$  month), long-term restenosis ( $\geq 50\%$  stenosis verified by angiography, mean follow-up  
6  $\geq 6$  month), TIA rate (short- or long-term), other major complications)?  
7  
8  
9

10  
11 YES\_\_\_\_ NO\_\_\_\_ UNCLEAR\_\_\_\_  
12  
13

- 14  
15 5. Is this a relevant study design (experimental, quasi-experimental, observational cohort, case-control  
16 or registry studies)?  
17

18  
19 YES\_\_\_\_ NO\_\_\_\_ UNCLEAR\_\_\_\_  
20  
21  
22

23 If you answer NO to any of these questions, the citation/study will be excluded. All other full-text articles  
24 will be included.  
25  
26  
27  
28  
29  
30  
31  
32  
33  
34  
35  
36  
37  
38  
39  
40  
41  
42  
43  
44  
45  
46  
47  
48  
49  
50  
51  
52  
53  
54  
55  
56  
57  
58  
59  
60

1  
2  
3  
4  
5 **Supplement 4.** Adapted Newcastle-Ottawa Scale for observational studies.

6 **1. Adapted Newcastle-Ottawa Scale for cohort studies:**

7 Note: A study can be awarded a maximum of one star for each numbered item within the Selection and  
8 Outcome categories. A maximum of two stars can be given for Comparability  
9

10  
11 **Selection**

12 1) Representativeness of the exposed cohort

- 13 a) truly representative of the average symptomatic intracranial stenosis in the community \*
- 14 b) somewhat representative of the average symptomatic intracranial stenosis in the community \*
- 15 c) selected group of patients
- 16 d) no description of the derivation of the cohort

17  
18 2) Selection of the non exposed cohort

- 19 a) drawn from the same community as the exposed cohort \*
- 20 b) drawn from a different source
- 21 c) no description of the derivation of the non exposed cohort

22  
23 3) Ascertainment of exposure

- 24 a) secure record (eg surgical records) \*
- 25 b) structured interview \*
- 26 c) written self report
- 27 d) no description

28  
29 4) Demonstration that outcome of interest was not present at start of study

- 30 a) yes \*
- 31 b) no

32  
33 **Comparability**

34 1) Comparability of cohorts on the basis of the design or analysis

- 35 a) study controls for treatments of symptomatic intracranial stenosis \*
- 36 b) study controls for any additional factor \* (This criteria could be modified to indicate specific  
37 control for a second important factor.)

38  
39 **Outcome**

40 1) Assessment of outcome

- 41 a) independent blind assessment \*
- 42 b) record linkage \*
- 43 c) self report
- 44 d) no description

45  
46 2) Was follow-up long enough for outcomes to occur

- 47 a) yes (select an adequate follow up period for outcome of interest) \*
- 48 b) no

49  
50 3) Adequacy of follow up of cohorts

- 51 a) complete follow up - all subjects accounted for \*
- 52 b) subjects lost to follow up unlikely to introduce bias - small number lost - > 80 % follow up, or  
53 description provided of those lost) \*
- 54 c) follow up rate < 80% and no description of those lost
- 55  
56  
57  
58  
59  
60

1  
2  
3  
4 d) no statement  
5  
6  
7

## 8 **2. Adapted Newcastle-Ottawa Scale for case-control studies:**

9  
10 Note: A study can be awarded a maximum of one star for each numbered item within the Selection and  
11 Exposure categories. A maximum of two stars can be given for Comparability.  
12

### 13 **Selection**

- 14  
15 1) Is the case definition adequate?  
16 a) yes, with independent validation \*  
17 b) yes, eg record linkage or based on self reports  
18 c) no description  
19  
20 2) Representativeness of the cases  
21 a) consecutive or obviously representative series of cases \*  
22 b) potential for selection biases or not stated  
23  
24 3) Selection of Controls  
25 a) community controls \*  
26 b) hospital controls  
27 c) no description  
28  
29 4) Definition of Controls  
30 a) no history of disease (endpoint) \*  
31 b) no description of source  
32

### 33 **Comparability**

- 34 1) Comparability of cases and controls on the basis of the design or analysis  
35 a) study controls for treatments of symptomatic intracranial stenosis \*  
36 b) study controls for any additional factor \* (This criteria could be modified to indicate specific  
37 control for a second important factor.)  
38

### 39 **Exposure**

- 40  
41 1) Ascertainment of exposure  
42 a) secure record (eg surgical records) \*  
43 b) structured interview where blind to case/control status \*  
44 c) interview not blinded to case/control status  
45 d) written self report or medical record only  
46 e) no description  
47  
48 2) Same method of ascertainment for cases and controls  
49 a) yes \*  
50 b) no  
51  
52 3) Non-Response rate  
53 a) same rate for both groups \*  
54 b) non respondents described  
55 c) rate different and no designation  
56  
57  
58  
59  
60

1  
2  
3  
4  
5  
6  
7  
8  
9  
10  
11  
12  
13  
14  
15  
16  
17  
18  
19  
20  
21  
22  
23  
24  
25  
26  
27  
28  
29  
30  
31  
32  
33  
34  
35  
36  
37  
38  
39  
40  
41  
42  
43  
44  
45  
46  
47  
48  
49  
50  
51  
52  
53  
54  
55  
56  
57  
58  
59  
60

For peer review only
