# Supplementary material for: Endovascular treatment for symptomatic intracranial artery stenosis: protocol for a systematic review and network meta-analysis
Source: PubMed Central journal article supplement — BMJ Open. 2018 Jul 10;8(7):e022359. doi: 10.1136/bmjopen-2018-022359 (PMC6089297; doi:10.1136/bmjopen-2018-022359), 2018-07-10
Supplement: bmjopen-2018-022359.reviewer_comments.pdf [file bmjopen-2018-022359.reviewer_comments.pdf]

## PEER REVIEW HISTORY

BMJ Open publishes all reviews undertaken for accepted manuscripts. Reviewers are asked to complete a checklist review form (<http://bmjopen.bmj.com/site/about/resources/checklist.pdf>) and are provided with free text boxes to elaborate on their assessment. These free text comments are reproduced below.

### ARTICLE DETAILS

|                            |                                                                                                                                 |
|----------------------------|---------------------------------------------------------------------------------------------------------------------------------|
| <b>TITLE (PROVISIONAL)</b> | Endovascular treatment for symptomatic intracranial artery stenosis: protocol for a systematic review and network meta-analysis |
| <b>AUTHORS</b>             | Wang, Tao; Wang, Xue; Yang, Kun; Zhang, Jing; Luo, Jichang; Gao, Peng; Ma, Yan; Ling, Feng; Jiao, Liqun                         |

### VERSION 1 – REVIEW

|                        |                                                          |
|------------------------|----------------------------------------------------------|
| <b>REVIEWER</b>        | Taketo Hatano<br>Kokura Memorial Hospital, Japan<br>None |
| <b>REVIEW RETURNED</b> | 10-Mar-2018                                              |

|                         |                                                                                                          |
|-------------------------|----------------------------------------------------------------------------------------------------------|
| <b>GENERAL COMMENTS</b> | The authors nicely planned and described the protocol for a systematic review and network meta-analysis. |
|-------------------------|----------------------------------------------------------------------------------------------------------|

|                        |                                                                                                                                                  |
|------------------------|--------------------------------------------------------------------------------------------------------------------------------------------------|
| <b>REVIEWER</b>        | Igor L Maldonado<br>Le Studium Loire Valley Institute for Advanced Studies, UMR 1253, iBrain, Université de Tours, Inserm, Tours, France<br>None |
| <b>REVIEW RETURNED</b> | 23-Mar-2018                                                                                                                                      |

|                         |                                                                                                                                                                                                                                                                                                                                                                                                                                                                                 |
|-------------------------|---------------------------------------------------------------------------------------------------------------------------------------------------------------------------------------------------------------------------------------------------------------------------------------------------------------------------------------------------------------------------------------------------------------------------------------------------------------------------------|
| <b>GENERAL COMMENTS</b> | <p>The authors propose a protocol for a metanalysis on the efficacy/safety of stenting/angioplasty for symptomatic intracranial arterial stenosis. It seems interesting to review the first primary objective ("determine the effects of different endovascular treatments on patients with symptomatic intracranial artery stenosis"). It seems vague the way it is written.</p> <p>The exact element being studied (such as efficacy or safety) should be mentioned here.</p> |
|-------------------------|---------------------------------------------------------------------------------------------------------------------------------------------------------------------------------------------------------------------------------------------------------------------------------------------------------------------------------------------------------------------------------------------------------------------------------------------------------------------------------|

### VERSION 1 – AUTHOR RESPONSE

Reviewer: 1

Reviewer Name: Taketo Hatano

Institution and Country: Kokura Memorial Hospital, Japan

Please state any competing interests or state 'None declared': None

Please leave your comments for the authors below

The authors nicely planned and described the protocol for a systematic review and network meta-analysis.

Answer: Thanks for your comments.

Reviewer: 2

Reviewer Name: Igor L Maldonado Institution and Country: Le Studium Loire Valley Institute for Advanced Studies, UMR 1253, iBrain, Université de Tours, Inserm, Tours, France

Please state any competing interests or state 'None declared': None

Please leave your comments for the authors below

The authors propose a protocol for a metaanalysis on the efficacy/safety of stenting/angioplasty for symptomatic intracranial arterial stenosis. It seems interesting to review the first primary objective ("determine the effects of different endovascular treatments on patients with symptomatic intracranial artery stenosis"). It seems vague the way it is written. The exact element being studied (such as efficacy or safety) should be mentioned here.

Answer: Thanks for your advice. The expression has been revised as "determine both the safety and efficacy of different endovascular treatments (i.e., balloon angioplasty alone, balloon-mounted stent or self-expanding stent) on patients with symptomatic intracranial artery stenosis" as you can see on page 5, line 12.
