# Supplementary material for: Endovascular treatment for symptomatic intracranial artery stenosis: protocol for a systematic review and network meta-analysis
Source: PubMed Central journal article supplement — BMJ Open. 2018 Jul 10;8(7):e022359. doi: 10.1136/bmjopen-2018-022359 (PMC6089297; doi:10.1136/bmjopen-2018-022359), 2018-07-10
Supplement: bmjopen-2018-022359supp002.pdf [file bmjopen-2018-022359supp002.pdf]

**Supplement 2.** Search strategy.

| Search step | Search terms                                                                                                                                                                                                                                                                                                                                                                                                                                                                                                                                                                                                                                                                                                                                                                                                                                                                                                                                                                                                                    |
|-------------|---------------------------------------------------------------------------------------------------------------------------------------------------------------------------------------------------------------------------------------------------------------------------------------------------------------------------------------------------------------------------------------------------------------------------------------------------------------------------------------------------------------------------------------------------------------------------------------------------------------------------------------------------------------------------------------------------------------------------------------------------------------------------------------------------------------------------------------------------------------------------------------------------------------------------------------------------------------------------------------------------------------------------------|
| #1          | ((((((((((((((((("Intracranial Arterial Diseases"[Mesh]) AND "Constriction, Pathologic"[Mesh]) OR "Intracranial Arteriosclerosis"[Mesh]) OR intracranial arterial stenosis) OR intracranial atherosclerosis) OR intracranial stenosis) OR intracranial atherosclerotic stenosis) OR intracranial atherosclerotic diseases) OR "Vertebrobasilar Insufficiency"[Mesh]) OR intracranial vertebral artery stenosis) OR intracranial vertebrobasilar artery stenosis) OR ischemic cerebrovascular disease caused by artery stenosis) OR basilar artery stenosis) OR cerebral artery stenosis) OR vertebral artery stenosis) OR atherosclerotic vertebrobasilar artery occlusion) OR (intracranial large artery stenoses and occlusions)) OR (intracranial large artery stenosis and occlusions)) OR intracranial vertebral artery atherosclerotic stenosis) OR vertebral atherosclerotic diseases) OR vertebral atherosclerosis diseases) OR intracranial internal carotid artery stenosis) OR atherosclerotic intracranial stenosis |
| #2          | (((balloon expandable intracranial stent*) OR balloon expandable stent*) OR balloon dilatable stent*) OR balloon mounted stent*) OR balloon angioplasty with stent*                                                                                                                                                                                                                                                                                                                                                                                                                                                                                                                                                                                                                                                                                                                                                                                                                                                             |
| #3          | (((self expanding stent*) OR self expanded stent*) OR self expandable stent*) OR primary stent*                                                                                                                                                                                                                                                                                                                                                                                                                                                                                                                                                                                                                                                                                                                                                                                                                                                                                                                                 |
| #4          | (((((((balloon angioplasty) OR balloon dilatation) OR balloon dilation) OR primary angioplasty) OR intracranial angioplasty alone) OR endovascular treatment alone) OR endovascular therapy alone) OR intravascular treatment alone) OR intravascular therapy alone                                                                                                                                                                                                                                                                                                                                                                                                                                                                                                                                                                                                                                                                                                                                                             |

|     |                                                                                                                                                                                                                                                                                                                                                                                                                                                                                                                                                                                                                                                                                                                                                                                                                                                                                                                                                                                                                                                                                                                                                                                                                                                                                                                                                                                                                                                                                                                                                                                                                                                                                                                                  |
|-----|----------------------------------------------------------------------------------------------------------------------------------------------------------------------------------------------------------------------------------------------------------------------------------------------------------------------------------------------------------------------------------------------------------------------------------------------------------------------------------------------------------------------------------------------------------------------------------------------------------------------------------------------------------------------------------------------------------------------------------------------------------------------------------------------------------------------------------------------------------------------------------------------------------------------------------------------------------------------------------------------------------------------------------------------------------------------------------------------------------------------------------------------------------------------------------------------------------------------------------------------------------------------------------------------------------------------------------------------------------------------------------------------------------------------------------------------------------------------------------------------------------------------------------------------------------------------------------------------------------------------------------------------------------------------------------------------------------------------------------|
| #5  | <p>((((((((((((("Drug Therapy"[Mesh]) OR drug therapy) OR pharmacotherapy) OR chemotherapy) OR medication)) OR (((((((((((((((("Aspirin"[Mesh]) OR aspirin) OR acetylsalicylic acid) OR ASA) OR "2-acetyloxy benzoic acid") OR acylpyrin) OR aloxiprinum) OR colfarit) OR disopril) OR ecotrin) OR endosprin) OR magnecyl) OR micristin) OR polopirin) OR polopiryna) OR solprins) OR solupsan) OR zorprin) OR acetysal)) OR (((((((((((("clopidogrel" [Supplementary Concept]) OR clopidogrel) OR iscover) OR pcr 4099) OR pcr-4099) OR pcr4099) OR plavix) OR sr 25989) OR sr-25989) OR sr25989) OR sr 25990c) OR sr-25990c) OR sr25990c)) OR (((((((((((("Warfarin"[Mesh]) OR warfarin) OR aldocumar) OR warfant) OR coumadin) OR coumarin) OR marevan) OR coumadine) OR tedicumar) OR jantoven) OR waran)) OR (((((((((((("cilostazol" [Supplementary Concept]) OR cilostazol) OR pletal) OR pletaal) OR OPC 13013) OR OPC-13013) OR OPC13013) OR OPC 21) OR OPC-21) OR OPC21)) OR (((((((("Ticagrelor" [Supplementary Concept]) OR ticagrelor) OR brilinta) OR brilique) OR AZD 6140) OR AZD-6140) OR AZD6140)) OR (((((((((((("Ticlopidine"[Mesh]) OR ticlopidine) OR ticlid) OR tiklid) OR ticlodix) OR ticlodone) OR panaldine) OR 53 32C) OR 53-32C) OR 5332C)) OR (((((((((((("Prasugrel Hydrochloride"[Mesh]) OR prasugrel) OR efient) OR effient) OR CS 747) OR CS-747) OR CS747) OR LY 640315) OR LY-640315) OR LY640315)) OR (((("Thienopyridines"[Mesh]) OR thienopyridine) OR thienopyridines)) OR (((((((("Aspirin, Dipyridamole Drug Combination"[Mesh]) OR aspirin-dipyridamole drug combination) OR aspirin dipyridamole drug combination) OR TX 3301) OR TX-3301) OR TX3301) OR asasantin) OR aggrenox)</p> |
| #6  | <p>((((((((("Cerebral Revascularization"[Mesh]) OR extracranial-intracranial) OR extracranial intracranial) OR extra-intracranial) OR extra intracranial) OR EC-IC) OR ECIC) OR graft) OR bypass) OR bypasses</p>                                                                                                                                                                                                                                                                                                                                                                                                                                                                                                                                                                                                                                                                                                                                                                                                                                                                                                                                                                                                                                                                                                                                                                                                                                                                                                                                                                                                                                                                                                                |
| #7  | #1 AND #2 AND #3 AND #4                                                                                                                                                                                                                                                                                                                                                                                                                                                                                                                                                                                                                                                                                                                                                                                                                                                                                                                                                                                                                                                                                                                                                                                                                                                                                                                                                                                                                                                                                                                                                                                                                                                                                                          |
| #8  | #1 AND (#2 OR #3 OR #4)                                                                                                                                                                                                                                                                                                                                                                                                                                                                                                                                                                                                                                                                                                                                                                                                                                                                                                                                                                                                                                                                                                                                                                                                                                                                                                                                                                                                                                                                                                                                                                                                                                                                                                          |
| #9  | #1 AND #5 AND #6                                                                                                                                                                                                                                                                                                                                                                                                                                                                                                                                                                                                                                                                                                                                                                                                                                                                                                                                                                                                                                                                                                                                                                                                                                                                                                                                                                                                                                                                                                                                                                                                                                                                                                                 |
| #10 | Filters: Publication date from 2000/01/01; English                                                                                                                                                                                                                                                                                                                                                                                                                                                                                                                                                                                                                                                                                                                                                                                                                                                                                                                                                                                                                                                                                                                                                                                                                                                                                                                                                                                                                                                                                                                                                                                                                                                                               |
| #11 | (#7 OR #8 OR #9) AND #10                                                                                                                                                                                                                                                                                                                                                                                                                                                                                                                                                                                                                                                                                                                                                                                                                                                                                                                                                                                                                                                                                                                                                                                                                                                                                                                                                                                                                                                                                                                                                                                                                                                                                                         |
