# Supplementary material for: Endovascular treatment for symptomatic intracranial artery stenosis: protocol for a systematic review and network meta-analysis
Source: PubMed Central journal article supplement — BMJ Open. 2018 Jul 10;8(7):e022359. doi: 10.1136/bmjopen-2018-022359 (PMC6089297; doi:10.1136/bmjopen-2018-022359), 2018-07-10
Supplement: bmjopen-2018-022359supp003.pdf [file bmjopen-2018-022359supp003.pdf]

### **Supplement 3. Screening pilot-test form**

#### **Level 1 screening**

1. Does the study include patients with intracranial stenosis?

YES\_\_\_ NO\_\_\_ UNCLEAR\_\_\_

2. Were the patients treated with medical treatment alone, endovascular treatment, or extracranial-intracranial bypass?

YES\_\_\_ NO\_\_\_ UNCLEAR\_\_\_

3. Were the patients treated with one of the above treatments compared to each other?

YES\_\_\_ NO\_\_\_ UNCLEAR\_\_\_

4. Is this a relevant study design (e.g., experimental, quasi-experimental, observational studies)?

YES\_\_\_ NO\_\_\_ UNCLEAR\_\_\_

If you answer NO to any of these questions, the citation will be excluded. All other citations will be included in L2 screening.

#### **Level 2 screening**

1. Does the study include patients with symptomatic intracranial stenosis ( $\geq 50\%$ ) ?

YES\_\_\_ NO\_\_\_ UNCLEAR\_\_\_

2. Were the women treated with medical treatment alone, balloon angioplasty alone, balloon-mounted stent, self-expandable stent, or extracranial-intracranial bypass.

YES\_\_\_ NO\_\_\_ UNCLEAR\_\_\_

3. Were the patients treated with one of the above treatments compared to each other?

YES\_\_\_ NO\_\_\_ UNCLEAR\_\_\_

4. Does the study report at least one of our safety outcomes of interest (e.g., short-term mortality or stroke rate (peri-procedural, or mean follow-up  $\leq 3$  month), long-term mortality or stroke rate (mean follow-up  $\geq 6$  month), long-term restenosis ( $\geq 50\%$  stenosis verified by angiography, mean follow-up  $\geq 6$  month), TIA rate (short- or long-term), other major complications)?

YES\_\_\_\_ NO\_\_\_\_ UNCLEAR\_\_\_\_

5. Is this a relevant study design (experimental, quasi-experimental, observational cohort, case-control or registry studies)?

YES\_\_\_\_ NO\_\_\_\_ UNCLEAR\_\_\_\_

If you answer NO to any of these questions, the citation/study will be excluded. All other full-text articles will be included.
