# Supplementary material for: Endovascular treatment for symptomatic intracranial artery stenosis: protocol for a systematic review and network meta-analysis
Source: PubMed Central journal article supplement — BMJ Open. 2018 Jul 10;8(7):e022359. doi: 10.1136/bmjopen-2018-022359 (PMC6089297; doi:10.1136/bmjopen-2018-022359), 2018-07-10
Supplement: bmjopen-2018-022359supp004.pdf [file bmjopen-2018-022359supp004.pdf]

**Supplement 4.** Adapted Newcastle-Ottawa Scale for observational studies.

### **1. Adapted Newcastle-Ottawa Scale for cohort studies:**

Note: A study can be awarded a maximum of one star for each numbered item within the Selection and Outcome categories. A maximum of two stars can be given for Comparability

#### **Selection**

- 1) Representativeness of the exposed cohort
  - a) truly representative of the average symptomatic intracranial stenosis in the community \*
  - b) somewhat representative of the average symptomatic intracranial stenosis in the community \*
  - c) selected group of patients
  - d) no description of the derivation of the cohort
- 2) Selection of the non exposed cohort
  - a) drawn from the same community as the exposed cohort \*
  - b) drawn from a different source
  - c) no description of the derivation of the non exposed cohort
- 3) Ascertainment of exposure
  - a) secure record (eg surgical records) \*
  - b) structured interview \*
  - c) written self report
  - d) no description
- 4) Demonstration that outcome of interest was not present at start of study
  - a) yes \*
  - b) no

#### **Comparability**

- 1) Comparability of cohorts on the basis of the design or analysis
  - a) study controls for treatments of symptomatic intracranial stenosis \*
  - b) study controls for any additional factor \* (This criteria could be modified to indicate specific control for a second important factor.)

#### **Outcome**

- 1) Assessment of outcome
  - a) independent blind assessment \*
  - b) record linkage \*
  - c) self report
  - d) no description
- 2) Was follow-up long enough for outcomes to occur
  - a) yes (select an adequate follow up period for outcome of interest) \*
  - b) no
- 3) Adequacy of follow up of cohorts
  - a) complete follow up - all subjects accounted for \*
  - b) subjects lost to follow up unlikely to introduce bias - small number lost - > 80 % follow up, or description provided of those lost) \*
  - c) follow up rate < 80% and no description of those lost

d) no statement

## 2. Adapted Newcastle-Ottawa Scale for case-control studies:

Note: A study can be awarded a maximum of one star for each numbered item within the Selection and Exposure categories. A maximum of two stars can be given for Comparability.

### Selection

- 1) Is the case definition adequate?
  - a) yes, with independent validation \*
  - b) yes, eg record linkage or based on self reports
  - c) no description
- 2) Representativeness of the cases
  - a) consecutive or obviously representative series of cases \*
  - b) potential for selection biases or not stated
- 3) Selection of Controls
  - a) community controls \*
  - b) hospital controls
  - c) no description
- 4) Definition of Controls
  - a) no history of disease (endpoint) \*
  - b) no description of source

### Comparability

- 1) Comparability of cases and controls on the basis of the design or analysis
  - a) study controls for treatments of symptomatic intracranial stenosis \*
  - b) study controls for any additional factor \* (This criteria could be modified to indicate specific control for a second important factor.)

### Exposure

- 1) Ascertainment of exposure
  - a) secure record (eg surgical records) \*
  - b) structured interview where blind to case/control status \*
  - c) interview not blinded to case/control status
  - d) written self report or medical record only
  - e) no description
- 2) Same method of ascertainment for cases and controls
  - a) yes \*
  - b) no
- 3) Non-Response rate
  - a) same rate for both groups \*
  - b) non respondents described
  - c) rate different and no designation
